# Supplementary material for: Stigmellamultispicata Rociene. & Stonis, an Asian leafminer on Siberian elm, now widespread in eastern North America (Lepidoptera, Nepticulidae)
Source: Zookeys. 2018 Sep 12;(784):95–125. doi: 10.3897/zookeys.784.27296 (PMC6160820; doi:10.3897/zookeys.784.27296)
Supplement: Supplementary material 1 — Specimen data of Stigmellamultispicata and other Ulmus mining Nepticulidae [file zookeys-784-095-s001.xlsx]

## Sheet: Blad1
Supplementary material , Specimen data of Stigmella multispicata and other Ulmus mining Nepticulidae, File Type .xls.
Stigmella multispicata Rocienė & Stonis, an Asian leafminer on Siberian elm, now widespread in eastern North America (Lepidoptera: Nepticulidae)
Erik J. van Nieukerken, Daniel Owen Gilrein & Charles S. Eiseman
ZooKeys 784: 95-215.
doi 10.3897/zookeys.784.27296		this supplement:	doi 10.3897/zookeys.784.27296.suppl1
catalogNumber	identifiedBy	basisOfRecord	scientificName	MaleCount	FemaleCount	AdultCount	larvaeCount	pupaCount	MinesCountVerbatim	CollectedStage	Country	stateProvince	AdminDivision2	AdminDivision3	LocalityVerbatim	Collector	ExactStartingDate	ExactEndingDate	DateVerbatim	dateOfEmeregenceStart	dateOfEmeregenceEnd	EventIdVerbatim	otherCatalogNumber	Notes	typeStatus	EarlierIdentification	CollectionDetail	Habitat	Method	institutionCode	CollectionNote	Storage	HostName	HostVerbatim	HostIdentificationQualifer	HostIdentifiedBy	MicroscopicPreparation	AssociatedPreparations	PartsPrepared	PreparationMedium	PreparationMaker	PreparationDate	dateIdentified	verbatimCoordinates	verbatimCoordinateSystem	georeferenceSources	geodeticDatum	decimalLatitude	decimalLongitude
RMNH.INS.45003	E.J. van Nieukerken	PreservedSpecimen	Stigmella multispicata						1	mine	Canada	Ontario	Ottawa	Hintonburg	Bayview Rd	E.J. van Nieukerken	2018-07-12					EvN no 2018080-H					leafmines	waste area in city		RMNH	vacated mines	small envelope	Ulmus pumila	Ulmus pumila		E.J. van Nieukerken							2018-07-12			GPS Samsung GalaxyS7	WGS84	45.4088	-75.7246
BIOUG25505-D03	Angela Telfer	PreservedSpecimen	Stigmella multispicata			1				adult	Canada	Ontario	Toronto	Eastdale CI	EQP-CLL-605	David Servos	2015-10-02					GMP#08428								BIOUG	Whole Voucher												1707					43.666	-79.349
BIOUG16150-E04	E.J. van Nieukerken	PreservedSpecimen	Stigmella multispicata	1						adult	Canada	Ontario	Toronto	Etobicoke	Etobicoke School of the Arts, EQP-CLL-602	Brad Schumacher	2014-09-22	2014-09-28				GMP#05745							Malaise trap	BIOUG		eppendorf ethanol 96														Google Earth	WGS84	43.631	-79.504
BIOUG16150-E05	E.J. van Nieukerken	PreservedSpecimen	Stigmella multispicata		1					adult	Canada	Ontario	Toronto	Etobicoke	Etobicoke School of the Arts, EQP-CLL-602	Brad Schumacher	2014-09-22	2014-09-28				GMP#05745							Malaise trap	BIOUG		eppendorf ethanol 96														Google Earth	WGS84	43.631	-79.504
	E.J. van Nieukerken	PhotoRecord	Stigmella multispicata			1				adult	Canada	Ontario	Toronto		Yarmouth Gardens	dbeadle	2016-07-18																										2018-05-30			Google Earth	WGS84	43.6707	-79.4172
	E.J. van Nieukerken	PhotoRecord	Stigmella multispicata			mini invasion				adult	Canada	Ontario	Toronto		Yarmouth Gardens	dbeadle	2015-07-26																										2018-05-30			Google Earth	WGS84	43.6707	-79.4172
BIOUG25491-E12	Angela Telfer	PreservedSpecimen	Stigmella multispicata			1				adult	Canada	Ontario	Waterloo	Kitchener	Crestview Public School, EQP-CLL-863	Sherrie Cochrane	2015-10-02					GMP#08378								BIOUG	Whole Voucher												1707					43.454	-80.44
RMNH.INS.45004	E.J. van Nieukerken	PreservedSpecimen	Stigmella multispicata						4	adult	Canada	Québec	Montreal	Old Montreal	Avenue de l'Hotel de Ville	E.J. van Nieukerken	2018-08-01					EvN no 2018101-H					leafmines	trees along street		RMNH	vacated mines	small envelope	Ulmus pumila	Ulmus pumila		E.J. van Nieukerken							2018-08-01			Google Earth	WGS84	45.5089	-73.556
RMNH.INS.44328	E.J. van Nieukerken	PreservedSpecimen	Stigmella multispicata						4	larva	China	Beijing Shi			Beijing, Xiangshan, Wofosi and botanical garden	E.J. van Nieukerken & J.W. van Driel	1984-10-01					EvN no 18-1-1K					leafmines	Hills with deciduous shrub and low trees		RMNH	rearing failed	small envelope	Ulmus macrocarpa	Ulmus macrocarpa		E.J. van Nieukerken							2018-01-01	39.59-116.12	DM	map		39.9833	116.2
RMNH.INS.44330	E.J. van Nieukerken	PreservedSpecimen	Stigmella multispicata						1	mine	China	Beijing Shi			Beijing, Xiangshan, Wofosi and botanical garden	E.J. van Nieukerken & J.W. van Driel	1984-10-01					EvN no 18-1-1H					leafmines	Hills with deciduous shrub and low trees		RMNH	vacated mines	small envelope	Ulmus macrocarpa	Ulmus macrocarpa		E.J. van Nieukerken							2018-01-01	39.59-116.12	DM	map		39.9833	116.2
RMNH.INS.30070	E.J. van Nieukerken	PreservedSpecimen	Stigmella multispicata				1			larva	China	Beijing Shi			Beijng Botanical garden - Wofosi	E.J. van Nieukerken & S. Richter	2013-10-17					EvN no 2013117-M		dried out larva			leafmines	botanical garden		RMNH	DNA extract (+slide)		Ulmus pumila	Ulmus pumila	re-identified 2017	E.J. van Nieukerken										GPS Dakota	WGS84	40.0042	116.204
RMNH.INS.43922	E.J. van Nieukerken	PreservedSpecimen	Stigmella multispicata						1 mine (green larva)	larva	China	Beijing Shi			Beijng Botanical garden - Wofosi	E.J. van Nieukerken & S. Richter	2013-10-17					EvN no 2013117-M	RMNH.INS.30070				leafmines	botanical garden		RMNH	larva DNA barcoded	small envelope	Ulmus pumila	Ulmus pumila	re-identified 2017	E.J. van Nieukerken							2017-11-27			GPS Dakota	WGS84	40.0042	116.204
RMNH.INS.43923	E.J. van Nieukerken	PreservedSpecimen	Stigmella multispicata						1	mine	China	Beijing Shi			Beijng Botanical garden - Wofosi	E.J. van Nieukerken & S. Richter	2013-10-17					EvN no 2013117-1H					leafmines	botanical garden		RMNH	vacated mines	small envelope	Ulmus pumila	Ulmus pumila	re-identified 2017	E.J. van Nieukerken							2017-11-27			GPS Dakota	WGS84	40.0042	116.204
	R. Stonis	LiteratureRecord	Stigmella multispicata	1						adult	Russia	Primorye Kraj		20 km E Ussuriysk	Gornotayezhnoe, Biological Station	A. Rocienė	2011-08-08								Holotype					ZIN							AG427		Male genitalia		A. Rociene					Google Earth	WGS84	43.692	132.164
	E.J. van Nieukerken	PhotoRecord	Stigmella multispicata		1					adult	United States	Illinois	Cook Co.	Skokie	Balaban House	John & Jane Balaban	2017-08-24																										2018-05-24			Google Earth	WGS84	42.04	-87.73
	E.J. van Nieukerken	PhotoRecord	Stigmella multispicata						several	mine	United States	Illinois	Lisle Co.		Morton Arboretum	Bruce J. Marlin	2010-10-04						acc. 325-70*4										Ulmus pumila	Ulmus pumila									2018-02-22			Google Earth	WGS84	41.813	-88.069
	E.J. van Nieukerken	PhotoRecord	Stigmella multispicata						several	mine	United States	Illinois	Urbana Co.		collector's apartment complex	John Hilty	2010-09-04							young mines on photo									Ulmus pumila	Ulmus pumila									2018-02-22			Google Earth	WGS84	40.123	-88.1956
	E.J. van Nieukerken	PreservedSpecimen	Stigmella multispicata	1						adult	United States	Indiana	Pulaski Co.		Pulaski Co., Jasper-Pulaski FWA	J. Vargo	2010-08-04							abdomen missing						USNM														41 09' 31.0"N 086 58' 42.6"W	Degrees Minutes Seconds	label		41.1586	-86.9785
	James Vargo	HumanObservation	Stigmella multispicata			120				adult	United States	Indiana	St. Joseph Co.		Mishawaka	J. Vargo	2018-07-08							no other neps in the trap						J. Vargo Research collection													2018-07-09			Google Earth	WGS84	41.659	-86.1618
RMNH.INS.15499	E.J. van Nieukerken	PreservedSpecimen	Stigmella multispicata		1					adult	United States	Indiana	St. Joseph Co.		St. Joseph County	J. Vargo	2010-08-10													MEM							JCK8617		Female genitalia	euparal	JC Koster			N 41.37'46.2"-W 86.08'13.9"	Degrees Minutes Seconds	label		41.6295	-86.1372
RMNH.INS.24511	E.J. van Nieukerken	PreservedSpecimen	Stigmella multispicata	1						adult	United States	Indiana	St. Joseph Co.		St. Joseph County	J. Vargo	2010-08-13							+ DNA						RMNH							EvN4511		Male genitalia	euparal	E.J. van Nieukerken	2014-02-05	1401	N 41.37'46.2"-W 86.08'13.9"	Degrees Minutes Seconds	label		41.6295	-86.1372
	E.J. van Nieukerken	PreservedSpecimen	Stigmella multispicata		1					adult	United States	Indiana	St. Joseph Co.		St. Joseph County	J. Vargo	2010-05-26													USNM														N 41.37'46.2"-W 86.08'13.9"	Degrees Minutes Seconds	label		41.6295	-86.1372
	E.J. van Nieukerken	PreservedSpecimen	Stigmella multispicata	1						adult	United States	Indiana	St. Joseph Co.		St. Joseph County	J. Vargo	2010-08-02													USNM														N 41.37'46.2"-W 86.08'13.9"	Degrees Minutes Seconds	label		41.6295	-86.1372
	E.J. van Nieukerken	PreservedSpecimen	Stigmella multispicata	2	1					adult	United States	Indiana	St. Joseph Co.		St. Joseph County	J. Vargo	2010-08-10													USNM														N 41.37'46.2"-W 86.08'13.9"	Degrees Minutes Seconds	label		41.6295	-86.1372
	E.J. van Nieukerken	PreservedSpecimen	Stigmella multispicata		1					adult	United States	Indiana	St. Joseph Co.		St. Joseph County	J. Vargo	2010-08-13													USNM														N 41.37'46.2"-W 86.08'13.9"	Degrees Minutes Seconds	label		41.6295	-86.1372
	E.J. van Nieukerken	PreservedSpecimen	Stigmella multispicata	1	2					adult	United States	Indiana	St. Joseph Co.		St. Joseph County	J. Vargo	2010-09-06													USNM														N 41.37'46.2"-W 86.08'13.9"	Degrees Minutes Seconds	label		41.6295	-86.1372
	E.J. van Nieukerken	PreservedSpecimen	Stigmella multispicata		1					adult	United States	Indiana	St. Joseph Co.		St. Joseph County	J. Vargo	2010-08-10													MEM							JCK8416		Female genitalia	euparal	JC Koster	2016-05-24	1606	N 41.37'46.2"-W 86.08'13.9"	Degrees Minutes Seconds	label		41.6295	-86.1372
	E.J. van Nieukerken	PreservedSpecimen	Stigmella multispicata	1						adult	United States	Indiana	St. Joseph Co.		St. Joseph County	J. Vargo	2010-08-10													MEM							JCK8417		Male genitalia	euparal	JC Koster	2016-05-24	1606	N 41.37'46.2"-W 86.08'13.9"	Degrees Minutes Seconds	label		41.6295	-86.1372
	E.J. van Nieukerken	PreservedSpecimen	Stigmella multispicata	2	1					adult	United States	Indiana	St. Joseph Co.		St. Joseph County	J. Vargo	2010-08-10													MEM														N 41.37'46.2"-W 86.08'13.9"	Degrees Minutes Seconds	label		41.6295	-86.1372
	E.J. van Nieukerken	PreservedSpecimen	Stigmella multispicata	1						adult	United States	Indiana	St. Joseph Co.		St. Joseph County	J. Vargo	2010-08-11													MEM														N 41.37'46.2"-W 86.08'13.9"	Degrees Minutes Seconds	label		41.6295	-86.1372
	E.J. van Nieukerken	PreservedSpecimen	Stigmella multispicata	5	16					adult	United States	Indiana	St. Joseph Co.		St. Joseph County	J. Vargo	2010-08-15													MEM														N 41.37'46.2"-W 86.08'13.9"	Degrees Minutes Seconds	label		41.6295	-86.1372
	E.J. van Nieukerken	PreservedSpecimen	Stigmella multispicata		1					adult	United States	Indiana	St. Joseph Co.		St. Joseph County	J. Vargo	2010-08-28													MEM														N 41.37'46.2"-W 86.08'13.9"	Degrees Minutes Seconds	label		41.6295	-86.1372
	E.J. van Nieukerken	HumanObservation	Stigmella multispicata				4		4	larva	United States	Indiana	St. Joseph Co.		St. Joseph County	J. Vargo	2018-06-15	2018-06-28												J. Vargo Research collection			Ulmus pumila	Ulmus pumila		J. Vargo							2018-07-02					41.6295	-86.1372
	E.J. van Nieukerken	PhotoRecord	Stigmella multispicata						3	mine	United States	Iowa	Shelby Co.		Elk Horn, south of	M.J. Hatfield	2016-10-19							mines with dead (green) larva and parasitoids									Ulmus	Ulmus									2018-02-22			Google Earth	WGS84	41.586	-95.06
	E.J. van Nieukerken	PhotoRecord	Stigmella multispicata	1						adult	United States	Iowa	Winneshiek Co.	Cresco	100 Acre Wood	M.J. Hatfield	2014-07-27																										2018-05-24	43°25′54.65″N, 92°0′32.25″W	Degrees Minutes Seconds	Insecta Mundi 0617	WGS84	43.4318	-92.009
RMNH.INS.25052	E.J. van Nieukerken	PreservedSpecimen	Stigmella multispicata	1						adult	United States	Iowa	Winneshiek Co.		Plymouth Rock	M.J. Hatfield	2014-09-26										Black light in a planted prairie near woodlands along the Upper Iowa River	faux prairie		RMNH							EvN5052		Male genitalia	euparal	E.J. van Nieukerken		2018-03-14			Google Earth	WGS84	43.4376	-92.0041
	E.J. van Nieukerken	PhotoRecord	Stigmella multispicata						2	mine	United States	Maryland	Baltimore City Co.		Herring Run Park	Thomas Wilson	2013-10-15																Ulmus pumila	Ulmus parvifolia or pumila?		E.J. van Nieukerken							2018-02-22			Google Earth	WGS84	39.33	-76.57
	C. Eiseman		Stigmella multispicata						14	mine	United States	Massachusetts	Franklin Co.		Sunderland	314 Montague Rd	2018-07-23													C.S. Eiseman Research Collection			Ulmus pumila	Ulmus pumila		C. Eiseman							2018-07-23					42.4984	-72.5448
	E.J. van Nieukerken	PhotoRecord	Stigmella multispicata			1				adult	United States	Minnesota	Hennepin Co.		Minneapolis	Bill Johnson	2013-08-19																										2018-05-30			Google Earth	WGS84	44.97	-93.28
RMNH.INS.30697	E.J. van Nieukerken	PreservedSpecimen	Stigmella multispicata				1			larva	United States	New York	Suffolk Co.		Sagaponack	Ms. Lee Foster	2015-10-21													RMNH	Tissue collection -80	Freezer Box59	Ulmus pumila	Ulmus pumila		collector										Google Earth	WGS84	40.93	-72.28
RMNH.INS.30698	E.J. van Nieukerken	PreservedSpecimen	Stigmella multispicata				1			larva	United States	New York	Suffolk Co.		Sagaponack	Ms. Lee Foster	2015-10-21													RMNH	DNA extract (+slide)		Ulmus pumila	Ulmus pumila		collector	RMNH.INS.30698.P									Google Earth	WGS84	40.93	-72.28
RMNH.INS.30699	E.J. van Nieukerken	PreservedSpecimen	Stigmella multispicata				1			larva	United States	New York	Suffolk Co.		Sagaponack	Ms. Lee Foster	2015-10-21													RMNH	Tissue collection -80	Freezer Box59	Ulmus pumila	Ulmus pumila		collector										Google Earth	WGS84	40.93	-72.28
RMNH.INS.30700	E.J. van Nieukerken	PreservedSpecimen	Stigmella multispicata				1			larva	United States	New York	Suffolk Co.		Sagaponack	Ms. Lee Foster	2015-10-21													RMNH	Tissue collection -80	Freezer Box59	Ulmus pumila	Ulmus pumila		collector										Google Earth	WGS84	40.93	-72.28
	E.J. van Nieukerken	PreservedSpecimen	Stigmella multispicata			3				larva	United States	New York	Suffolk Co.		Sagaponack	Ms. Lee Foster	2015-10-21			2016-03-25	2016-05-19									RMNH			Ulmus pumila	Ulmus pumila		collector										Google Earth	WGS84	40.93	-72.28
	E.J. van Nieukerken	HumanObservation	Stigmella multispicata				masses			larva	United States	New York	Suffolk Co.		Sagaponack	Ms. Lee Foster	2015-10-21							larvae descending en masse from trees									Ulmus pumila	Ulmus pumila		collector										Google Earth	WGS84	40.93	-72.28
	E.J. van Nieukerken	HumanObservation	Stigmella multispicata				larvae still present			larva	United States	New York	Suffolk Co.		Sagaponack	Ms. Lee Foster	2015-11-08																Ulmus pumila	Ulmus pumila		collector										Google Earth	WGS84	40.93	-72.28
	E.J. van Nieukerken	HumanObservation	Stigmella multispicata				masses			larva	United States	New York	Suffolk Co.		Sagaponack	Mike?	2016-07-16																Ulmus pumila	Ulmus pumila		collector										Google Earth	WGS84	40.93	-72.28
	E.J. van Nieukerken	HumanObservation	Stigmella multispicata				masses			larva	United States	New York	Suffolk Co.		Sagaponack	Ms. Lee Foster	2016-10-19							larvae descending en masse from trees									Ulmus pumila	Ulmus pumila		collector										Google Earth	WGS84	40.93	-72.28
	E.J. van Nieukerken	HumanObservation	Stigmella multispicata				masses			larva	United States	New York	Suffolk Co.		Wainscott	arborist	2015-11-03							larvae descending en masse from trees									Ulmus pumila	Ulmus pumila		collector										Google Earth	WGS84	40.94	-72.24
RMNH.INS.15533	E.J. van Nieukerken	PreservedSpecimen	Stigmella multispicata	1							United States	Ohio	Franklin Co.		Hillard	D.J. Shetlar	2016-09-01													RMNH	Donation Steven Passoa											2017-08-11	1611	40.007X-83.1738	decimal degrees	label		40.007	-83.1738
RMNH.INS.24901	E.J. van Nieukerken	PreservedSpecimen	Stigmella multispicata	1							United States	Ohio	Franklin Co.		Hillard	D.J. Shetlar	2016-07-21													RMNH	Donation Steven Passoa						EvN4901		Male genitalia	Euparal	E.J. van Nieukerken	2016-11-28	1611	40.007X-83.1738	decimal degrees	label		40.007	-83.1738
	E.J. van Nieukerken	PhotoRecord	Stigmella multispicata			1					United States	Ohio	Pickaway Co.	Orient	9249 London Rd.	Gregory Raterman	2012-08-07										at light		light collected														2018-05-23			Google Earth	WGS84	39.8096	-83.2384
	E.J. van Nieukerken	PhotoRecord	Stigmella multispicata			1					United States	Tennessee	Davidson Co.		Nashville	Steven Bren	2010-07-25																										2018-05-24			Google Earth	WGS84	36.1	-86.8
	E.J. van Nieukerken	PhotoRecord	Stigmella multispicata			1					United States	Wisconsin	Dane Co.		Cross Plains	Ilona L.	2010-09-04																										2018-05-30			Google Earth	WGS84	43.11	-89.66
MM09660	Marko Mutanen	PreservedSpecimen	Stigmella ulmivora			1				adult	Finland	Aland Islands			Finstroem	Marko Mutanen, Tomi Mutanen, Panu Vaelimaeki, Petri hirvonen	2008-09-27							Data from BOLD						University of Oulu			Ulmus glabra	Ulmus glabra		M. Mutanen												60.296	20.483
MM09661	Marko Mutanen	PreservedSpecimen	Stigmella ulmivora			1				adult	Finland	Aland Islands			Finstroem	Marko Mutanen, Tomi Mutanen, Panu Vaelimaeki, Petri hirvonen	2008-09-27							Data from BOLD						University of Oulu	larva on Ulmus glabra, mine as voucher		Ulmus glabra	Ulmus glabra		M. Mutanen												60.296	20.483
RMNH.INS.17681	E.J. van Nieukerken	PreservedSpecimen	Stigmella ulmivora				1			larva	France	Alpes-Maritimes			Saorge, 0.8 km SW, vallée de Roya	E.J. van Nieukerken & C. Doorenweerd	2008-10-09					EvN no 2008168-2M		larva - taken from mine			leafmines	forest and shrub on gorge slopes	reared from larva	RMNH	DNA extract		Ulmus minor	Ulmus minor		E.J. van Nieukerken										GPS	WGS84	43.9819	7.5466
RMNH.INS.17682	E.J. van Nieukerken	PreservedSpecimen	Stigmella ulmivora				1			larva	France	Alpes-Maritimes			Saorge, 0.8 km SW, vallée de Roya	E.J. van Nieukerken & C. Doorenweerd	2008-10-09					EvN no 2008168-2M		larva - taken from mine			leafmines	forest and shrub on gorge slopes	reared from larva	RMNH	Tissue collection -80	Freezer Box23	Ulmus minor	Ulmus minor		E.J. van Nieukerken										GPS	WGS84	43.9819	7.5466
RMNH.INS.17683	E.J. van Nieukerken	PreservedSpecimen	Stigmella ulmivora				1			mine and larva	France	Alpes-Maritimes			Saorge, 0.8 km SW, vallée de Roya	E.J. van Nieukerken & C. Doorenweerd	2008-10-09					EvN no 2008168-2M		larva - with mine			leafmines	forest and shrub on gorge slopes	reared from larva	RMNH	Tissue collection -80	Freezer Box23	Ulmus minor	Ulmus minor		E.J. van Nieukerken										GPS	WGS84	43.9819	7.5466
RMNH.INS.42408	E.J. van Nieukerken	PreservedSpecimen	Stigmella ulmivora						2	vacated mines	France	Alpes-Maritimes			Saorge, 0.8 km SW, vallée de Roya	E.J. van Nieukerken & C. Doorenweerd	2008-10-09					EvN no 2008168-2H					leafmines	forest and shrub on gorge slopes		RMNH	vacated mines	small envelope	Ulmus minor	Ulmus minor		E.J. van Nieukerken							2009-08-07			GPS	WGS84	43.9819	7.5466
RMNH.INS.42410	E.J. van Nieukerken	PreservedSpecimen	Stigmella ulmivora						2	larva	France	Alpes-Maritimes			Saorge, 0.8 km SW, vallée de Roya	E.J. van Nieukerken & C. Doorenweerd	2008-10-09					EvN no 2008168-2M	RMNH.INS.17681, RMNH.INS.17683				leafmines	forest and shrub on gorge slopes		RMNH	larva barcoded	small envelope	Ulmus minor	Ulmus minor		E.J. van Nieukerken							2009-08-07			GPS	WGS84	43.9819	7.5466
RMNH.INS.42449	E.J. van Nieukerken	PreservedSpecimen	Stigmella ulmivora						1	vacated mine	France	Alpes-Maritimes			Tende, ca 1 km S, E. slope	E.J. van Nieukerken & C. Doorenweerd	2008-10-10					EvN no 2008197-2H					leafmines	Pinus sylvestris forest and shrub on limestone		RMNH	vacated mines	large envelope	Ulmus glabra	Ulmus glabra		E.J. van Nieukerken							2009-08-07			GPS	WGS84	44.0794	7.59442
	E.J. van Nieukerken	PreservedSpecimen	Stigmella ulmivora						+		France	Bouches-du-Rhône			Aix-en-Provence, Parc Jourdan	J.W. Schoorl	1983-10-12	1983-10-16				VU no. 83216					leafmines			RMNH			Ulmus	Ulmus		J.W. Schoorl							9709	43.3143-05.2646	Dec degrees Paris			43.525	5.43775
RMNH.INS.42773	E.J. van Nieukerken	PreservedSpecimen	Stigmella ulmivora						several	vacated mines	France	Cher			Villeneuve-sur-Cher	E.J. van Nieukerken	2009-07-30					EvN no 2009035-1H					leafmines	rivervalley, cultivated area		RMNH	vacated mines	small envelope	Ulmus minor	Ulmus minor		E.J. van Nieukerken							0907			GPS	WGS84	47.0266	2.22037
	E.J. van Nieukerken	PreservedSpecimen	Stigmella ulmivora						+	dead larva, vacated	France	Drôme			Beaurières, 4 km W: Marais des Boulignons	E.J. van Nieukerken	2002-08-21					EvN no 2002109-H		green larva			leafmines	forest along stream		RMNH			Ulmus	Ulmus		E.J. van Nieukerken							0304		Decimal degrees	map	WGS84	44.567	5.50356
RMNH.INS.44041	E.J. van Nieukerken	PreservedSpecimen	Stigmella ulmivora						1	vacated mines	France	Eure	Le Marais Vernier		la Vallée	E.J. van Nieukerken & S. Richter	2017-10-05					EvN no 2017129-H					leafmines	forest margins and limestone grassland		RMNH	vacated mines	small envelope	Ulmus	Ulmus		E.J. van Nieukerken							43069			GPS Dakota	WGS84	49.4115	0.53113
	E.J. van Nieukerken	HumanObservation	Stigmella ulmivora						several		France	Eure-et-Loir	Bonneval, 2.5 km N		Val de Loir	E.J. van Nieukerken	2016-07-21					EvN no 2016015					leafmines	forest edge, arable fields			vacated mines observed		Ulmus minor	Ulmus minor		E.J. van Nieukerken										GPS Dakota	WGS84	48.204	1.38172
RMNH.INS.41199	E.J. van Nieukerken	PreservedSpecimen	Stigmella ulmivora						2	vacated mines	France	Finistère			Presqu'ile de Crozon, ca 4 km E Crozon, l'Aber	E.J. van Nieukerken	2006-07-12 11:13:00					EvN no 2006040-H					leafmines	ancient chalkoven		RMNH	vacated mines	small envelope	Ulmus	Ulmus		E.J. van Nieukerken							0607			GPS	WGS84	48.2362	-4.42944
	E.J. van Nieukerken	PreservedSpecimen	Stigmella ulmivora						1	vacated	France	Haut-Rhin			Colmar, 3 km SW, Le Neuland	C. van den Berg & E.J. van Nieukerken	2002-09-26					EvN no 2002185-H					leafmines	in Fraxinus-Quercus forest		RMNH			Ulmus	Ulmus		E.J. van Nieukerken							0304		Decimal degrees	GPS	WGS84	48.0546	7.39373
RMNH.INS.11736	E.J. van Nieukerken	PreservedSpecimen	Stigmella ulmivora				1			larva	France	Haut-Rhin			Lapoutroie, La Bohle	E.J. van Nieukerken	2002-10-21					EvN no 2002219-M		?parasitized, but active			leafmines in fallen leaves	in forest	reared from larva	RMNH	DNA extract		Ulmus glabra	Ulmus glabra		E.J. van Nieukerken									Decimal degrees	GPS	WGS84	48.1571	7.16358
	E.J. van Nieukerken	PreservedSpecimen	Stigmella ulmivora						3	vacated	France	Haut-Rhin			Lapoutroie, La Bohle	E.J. van Nieukerken	2002-10-21					EvN no 2002219-H					leafmines in fallen leaves	in forest		RMNH			Ulmus glabra	Ulmus glabra		E.J. van Nieukerken							0304		Decimal degrees	GPS	WGS84	48.1571	7.16358
	E.J. van Nieukerken	PreservedSpecimen	Stigmella ulmivora						1	larvae	France	Haut-Rhin			Lapoutroie, La Bohle	E.J. van Nieukerken	2002-10-21					EvN no 2002219-Mol	RMNH.INS.11736				leafmines in fallen leaves	in forest		RMNH	leafmine collection	small envelope	Ulmus glabra	Ulmus glabra		E.J. van Nieukerken							0304		Decimal degrees	GPS	WGS84	48.1571	7.16358
RMNH.INS.44124	E.J. van Nieukerken	PreservedSpecimen	Stigmella ulmivora						3	vacated mines	France	Indre-et-Loir	Huismes	N of Contebault	along C17	E.J. van Nieukerken & S. Richter	2017-10-08					EvN no 2017169-1H					leafmines	forest edge along arable fields		RMNH	vacated mines	small envelope	Ulmus	Ulmus		E.J. van Nieukerken							43071			GPS Dakota	WGS84	47.2118	0.24196
RMNH.INS.42757	E.J. van Nieukerken	PreservedSpecimen	Stigmella ulmivora						several	vacated mines	France	Lozère			Marjoab, 2.5 km SW Meyrueis	E.J. van Nieukerken	2009-07-22					EvN no 2009018-H					leafmines	hedges, limestone area		RMNH	vacated mines	small envelope	Ulmus minor	Ulmus minor		E.J. van Nieukerken							0907			google earth	WGS84	44.1584	3.41673
RMNH.INS.42769	E.J. van Nieukerken	PreservedSpecimen	Stigmella ulmivora						3	vacated mines	France	Lozère			Barre-des-Cévennes	E.J. van Nieukerken	2009-07-26					EvN no 2009029-H					leafmines	hedges, limestone area		RMNH	vacated mines	small envelope	Ulmus minor	Ulmus minor		E.J. van Nieukerken							0907			GPS	WGS84	44.2421	3.6593
	E.J. van Nieukerken	PreservedSpecimen	Stigmella ulmivora						+		France	Pyrénées-Orientales			Port-Vendres, near railway station	E.J. van Nieukerken	1982-07-28					VU no. 82157					leafmines			RMNH			Ulmus	Ulmus		E.J. van Nieukerken							9709	42.31-3.06 E	DM			42.5153	3.09739
	E.J. van Nieukerken	HumanObservation	Stigmella ulmivora						1		France	Val d'Oise	Heurcourt		Rue des Gorgets	E.J. van Nieukerken	2016-07-17					EvN no 2016011					leafmines	humid deciduous forest			vacated mines observed		Ulmus minor	Ulmus minor		E.J. van Nieukerken										GPS Dakota	WGS84	49.1945	2.04971
RMNH.INS.15498	E.J. van Nieukerken	PreservedSpecimen	Stigmella ulmivora		1						Germany	Berlin			Berlin	H. Thiele														RMNH	ex coll. ZMA	pinned	Ulmus	Ulm
RMNH.INS.41457	E.J. van Nieukerken	PreservedSpecimen	Stigmella ulmivora						1	vacated mines	Germany	Brandenburg			Erkner	E.J. van Nieukerken	2007-09-09	2007-09-11				EvN no 2007105-H					leafmines	in village, park		RMNH	vacated mines	small envelope	Ulmus	Ulmus		E.J. van Nieukerken							0804			GPS	WGS84	52.4206	13.7494
RMNH.INS.40840	E.J. van Nieukerken	PreservedSpecimen	Stigmella ulmivora						several	old vacated mines	Germany	Saarland			Neunkirchen, Zoo	E.J. van Nieukerken	2004-09-30					EvN no 2004131-H					leafmines	Fagus/Quercus forest		RMNH	vacated mines	small envelope	Ulmus	Ulmus		E.J. van Nieukerken							0409			GPS	WGS84	49.3449	7.20662
RMNH.INS.40974	E.J. van Nieukerken	PreservedSpecimen	Stigmella ulmivora						1		Germany	Sachsen-Anhalt			Dornburg, 2 km S, along Elbe	E.J. van Nieukerken	2014-07-19					EvN no 2014054-H					leafmines	small bushes in river valley		RMNH	vacated mines	small envelope	Ulmus	Ulmus		E.J. van Nieukerken							2017-01-04			GPS Dakota	WGS84	52.0054	11.893
	E.J. van Nieukerken	PreservedSpecimen	Stigmella ulmivora	1							Germany	Thüringen			Bad Blankenburg, Muschelkalk	H. Steuer	1986-07-01													MHUB	Steuer collection												8709	50.41-11.16	Degrees Minutes	geonames	WGS84	50.68	11.27
	E.J. van Nieukerken	PreservedSpecimen	Stigmella ulmivora		1						Germany	Thüringen			Bad Blankenburg, Schwarzatal	H. Steuer	1986-07-05													MHUB	Steuer collection												8709	50.40-11.15		google earth	WGS84	50.67	11.25
RMNH.INS.41907	E.J. van Nieukerken	PreservedSpecimen	Stigmella ulmivora						several		Greece	Akhaia			Strofilia, S Kalogria	E.J. van Nieukerken & C. Doorenweerd	2011-11-04					EvN no 2011364-2H					leafmines	very wet woodland		RMNH	vacated mines	small envelope	Ulmus minor	Ulmus minor		E.J. van Nieukerken										GPS Dakota	WGS84	38.1392	21.385
RMNH.INS.41908	E.J. van Nieukerken	PreservedSpecimen	Stigmella ulmivora						10	larva	Greece	Akhaia			Strofilia, S Kalogria	E.J. van Nieukerken & C. Doorenweerd	2011-11-04					EvN no 2011364-2K					leafmines	very wet woodland		RMNH	larvae reared	small envelope	Ulmus minor	Ulmus minor		E.J. van Nieukerken										GPS Dakota	WGS84	38.1392	21.385
RMNH.INS.41909	E.J. van Nieukerken	PreservedSpecimen	Stigmella ulmivora						2	larva	Greece	Akhaia			Strofilia, S Kalogria	E.J. van Nieukerken & C. Doorenweerd	2011-11-04					EvN no 2011364-2M	RMNH.INS.18839, RMNH.INS.18840				leafmines	very wet woodland		RMNH	larva barcoded	small envelope	Ulmus minor	Ulmus minor		E.J. van Nieukerken										GPS Dakota	WGS84	38.1392	21.385
RMNH.INS.18839	E.J. van Nieukerken	PreservedSpecimen	Stigmella ulmivora				1			larva	Greece	Akhaia			Strofilia, S Kalogria	E.J. van Nieukerken & C. Doorenweerd	2011-11-04					EvN no 2011364-2M		larva taken from mine			leafmines	very wet woodland	reared from larva	RMNH	DNA extract		Ulmus minor	Ulmus minor		E.J. van Nieukerken										GPS Dakota	WGS84	38.1392	21.385
RMNH.INS.18840	E.J. van Nieukerken	PreservedSpecimen	Stigmella ulmivora				1			larva	Greece	Akhaia			Strofilia, S Kalogria	E.J. van Nieukerken & C. Doorenweerd	2011-11-04					EvN no 2011364-2M		larva taken from mine			leafmines	very wet woodland	reared from larva	RMNH	Tissue collection -80	Freezer Box38	Ulmus minor	Ulmus minor		E.J. van Nieukerken										GPS Dakota	WGS84	38.1392	21.385
RMNH.INS.41926	E.J. van Nieukerken	PreservedSpecimen	Stigmella ulmivora						several		Greece	Ilía			Olympia, archeological site	E.J. van Nieukerken & C. Doorenweerd	2011-11-05					EvN no 2011369-1H					leafmines	park area		RMNH	vacated mines	small envelope	Ulmus minor	Ulmus minor		E.J. van Nieukerken										GPS Dakota	WGS84	37.6361	21.629
RMNH.INS.41927	E.J. van Nieukerken	PreservedSpecimen	Stigmella ulmivora						6	larva	Greece	Ilía			Olympia, archeological site	E.J. van Nieukerken & C. Doorenweerd	2011-11-05					EvN no 2011369-1M	RMNH.INS.18870, 18871, 18872, 29029, 29046, 29064				leafmines	park area		RMNH	larva barcoded	small envelope	Ulmus minor	Ulmus minor		E.J. van Nieukerken										GPS Dakota	WGS84	37.6361	21.629
RMNH.INS.18870	E.J. van Nieukerken	PreservedSpecimen	Stigmella ulmivora				1			larva	Greece	Ilía			Olympia, archeological site	E.J. van Nieukerken & C. Doorenweerd	2011-11-05					EvN no 2011369-1M		parasitized larva taken from mine			leafmines	park area	reared from larva	RMNH	DNA extract		Ulmus minor	Ulmus minor		E.J. van Nieukerken										GPS Dakota	WGS84	37.6361	21.629
RMNH.INS.18871	E.J. van Nieukerken	PreservedSpecimen	Stigmella ulmivora				1			larva	Greece	Ilía			Olympia, archeological site	E.J. van Nieukerken & C. Doorenweerd	2011-11-05					EvN no 2011369-1M		larva taken from mine			leafmines	park area	reared from larva	RMNH	larval slide + DNA extract		Ulmus minor	Ulmus minor		E.J. van Nieukerken	RMNH.INS.18871.P		larval skin	Euparal	Camiel Doorenweerd					GPS Dakota	WGS84	37.6361	21.629
RMNH.INS.18872	E.J. van Nieukerken	PreservedSpecimen	Stigmella ulmivora				1			larva	Greece	Ilía			Olympia, archeological site	E.J. van Nieukerken & C. Doorenweerd	2011-11-05					EvN no 2011369-1M		larva taken from mine			leafmines	park area	reared from larva	RMNH	Tissue collection -80	Freezer Box38	Ulmus minor	Ulmus minor		E.J. van Nieukerken										GPS Dakota	WGS84	37.6361	21.629
RMNH.INS.29029	E.J. van Nieukerken	PreservedSpecimen	Stigmella ulmivora				1			larva	Greece	Ilía			Olympia, archeological site	E.J. van Nieukerken & C. Doorenweerd	2011-11-05					EvN no 2011369-1M		cocoon			leafmines	park area		RMNH	Tissue collection -80	Freezer Box40	Ulmus minor	Ulmus minor		E.J. van Nieukerken										GPS Dakota	WGS84	37.6361	21.629
RMNH.INS.29046	E.J. van Nieukerken	PreservedSpecimen	Stigmella ulmivora				1			larva	Greece	Ilía			Olympia, archeological site	E.J. van Nieukerken & C. Doorenweerd	2011-11-05					EvN no 2011369-1M		larva taken from mine			leafmines	park area		RMNH	Tissue collection -80	Freezer Box40	Ulmus minor	Ulmus minor		E.J. van Nieukerken										GPS Dakota	WGS84	37.6361	21.629
RMNH.INS.29064	E.J. van Nieukerken	PreservedSpecimen	Stigmella ulmivora				1			larva	Greece	Ilía			Olympia, archeological site	E.J. van Nieukerken & C. Doorenweerd	2011-11-05					EvN no 2011369-1M		larva left mine			leafmines	park area		RMNH	Tissue collection -80	Freezer Box40	Ulmus minor	Ulmus minor		E.J. van Nieukerken										GPS Dakota	WGS84	37.6361	21.629
	A. Lastuvka	PreservedSpecimen	Stigmella ulmivora	1							Greece	Préveza			Thesprotiko	A. & Z. Lastuvka	1998-06-11							data received from Lastuvka, 2003						Lastuvka, A., personal collection														34SDJ84	MGRS	geonames		39.21	20.77
RMNH.INS.41096	E.J. van Nieukerken	PreservedSpecimen	Stigmella ulmivora						1	vacated mines	Italy	Bolzano			Vinschgau, Prad an Stilfser Joch, Suldenbach banks	E.J. van Nieukerken	2005-07-27 19:08:00					EvN no 2005094-H					leafmines	river banks in cult area		RMNH	vacated mines	small envelope	Ulmus	Ulmus		E.J. van Nieukerken							0507			GPS	WGS84	46.6252	10.5954
RMNH.INS.41433	E.J. van Nieukerken	PreservedSpecimen	Stigmella ulmivora						many		Italy	Cuneo			Entracque, ca 1 km SE, Il Bosco	E.J. van Nieukerken	2007-08-16					EvN no 2007091-H					leafmines	roadside hedges		RMNH	vacated mines	small envelope	Ulmus	Ulmus		E.J. van Nieukerken							0708			GPS	WGS84	44.2372	7.4079
RMNH.INS.41434	E.J. van Nieukerken	PreservedSpecimen	Stigmella ulmivora						3	larva	Italy	Cuneo			Entracque, ca 1 km SE, Il Bosco	E.J. van Nieukerken	2007-08-16					EvN no 2007091-K/M	RMNH.INS.12595				leafmines	roadside hedges		RMNH	larva barcoded, rearing failed	small envelope	Ulmus	Ulmus		E.J. van Nieukerken							0708			GPS	WGS84	44.2372	7.4079
RMNH.INS.12595	E.J. van Nieukerken	PreservedSpecimen	Stigmella ulmivora				1			larva	Italy	Cuneo			Entracque, ca 1 km SE, Il Bosco	E.J. van Nieukerken	2007-08-16					EvN no 2007091-M		larva - left mine			leafmines	roadside hedges	reared from larva	RMNH	larval slide + DNA extract		Ulmus	Ulmus		E.J. van Nieukerken	RMNH.INS.12595.P		larval skin	Euparal	Camiel Doorenweerd					GPS	WGS84	44.2372	7.4079
RMNH.INS.15494	E.J. van Nieukerken	PreservedSpecimen	Stigmella ulmivora	1						larva	Italy	Cuneo			Entracque, ca 1 km SE, Il Bosco	E.J. van Nieukerken	2007-08-16			2008-05-26		EvN no 2007091					leafmines	roadside hedges	reared from larva	RMNH		in capsule, pinned	Ulmus	Ulmus		E.J. van Nieukerken							0708			GPS	WGS84	44.2372	7.4079
RMNH.INS.15495	E.J. van Nieukerken	PreservedSpecimen	Stigmella ulmivora					2 cocoons		larva	Italy	Cuneo			Entracque, ca 1 km SE, Il Bosco	E.J. van Nieukerken	2007-08-16			2008-05-26		EvN no 2007091					leafmines	roadside hedges	reared from larva	RMNH		in capsule, pinned	Ulmus	Ulmus		E.J. van Nieukerken							0708			GPS	WGS84	44.2372	7.4079
RMNH.INS.12596	E.J. van Nieukerken	PreservedSpecimen	Stigmella ulmivora	1						larva	Italy	Cuneo			Entracque, ca 1 km SE, Il Bosco	E.J. van Nieukerken & C. Doorenweerd	2008-10-13			2009-04-26	2009-05-02	EvN no 2008265-2K					leafmines	roadside hedges	reared from larva	RMNH			Ulmus	Ulmus		E.J. van Nieukerken										GPS	WGS84	44.2372	7.4079
RMNH.INS.12597	E.J. van Nieukerken	PreservedSpecimen	Stigmella ulmivora		1					larva	Italy	Cuneo			Entracque, ca 1 km SE, Il Bosco	E.J. van Nieukerken & C. Doorenweerd	2008-10-13			2009-04-26	2009-05-02	EvN no 2008265-2K					leafmines	roadside hedges	reared from larva	RMNH			Ulmus	Ulmus		E.J. van Nieukerken										GPS	WGS84	44.2372	7.4079
RMNH.INS.42552	E.J. van Nieukerken	PreservedSpecimen	Stigmella ulmivora						several	larva	Italy	Cuneo			Entracque, ca 1 km SE, Il Bosco	E.J. van Nieukerken & C. Doorenweerd	2008-10-13			2009-04-26	2009-05-02	EvN no 2008265-2K					leafmines	roadside hedges	reared from larva	RMNH	larvae reared	small envelope	Ulmus	Ulmus		E.J. van Nieukerken							2009-08-07			GPS	WGS84	44.2372	7.4079
	R. Johansson	PreservedSpecimen	Stigmella ulmivora		1						Italy	Latina			Monti Aurunci, 4 km NW Castelforte	R. Johansson	1969-06-22	1969-06-23												Johansson, R., personal collection							RJ0953		Female genitalia		R. Johansson		0206	33TVF07	MGRS			41.28	13.81
OPZOEKEN of niet verz?	E.J. van Nieukerken	PreservedSpecimen	Stigmella ulmivora						many	vacated mines	Italy	Roma			Roma, Villa Borghese, Zoological garden	E.J. van Nieukerken	2005-09-15 16:51:00					EvN no 2005105					leafmines	park in town		RMNH			Ulmus	Ulmus		E.J. van Nieukerken							0509			GPS	WGS84	41.918	12.489
RMNH.INS.41106	E.J. van Nieukerken	PreservedSpecimen	Stigmella ulmivora						3	vacated mines	Italy	Roma			Trevignano Romano	E.J. van Nieukerken	2005-09-17 09:04:00					EvN no 2005107-H					leafmines	dry rocky slopes		RMNH	vacated mines	small envelope	Ulmus	Ulmus		E.J. van Nieukerken							0509			GPS	WGS84	42.1559	12.248
RMNH.INS.41371	E.J. van Nieukerken	PreservedSpecimen	Stigmella ulmivora						3	old vacated mines	Monaco				Monaco Ville, E slope of Palais Principier	E.J. van Nieukerken	2007-08-09					EvN no 2007051-H					leafmines	park in city near sea		RMNH	vacated mines	small envelope	Ulmus	Ulmus		E.J. van Nieukerken							0708			Google earth	WGS84	43.7167	7.41667
	E.J. van Nieukerken	PreservedSpecimen	Stigmella ulmivora	2	2						Netherlands	Gelderland			Wageningen	A. van Frankenhuyzen	1977-05-19							(on trunk)						PDW			Ulmus											31UFT8361	MGRS	GAZET NL		51.97	5.664
	E.J. van Nieukerken	PreservedSpecimen	Stigmella ulmivora						+		Netherlands	Gelderland			Winterswijk, Bekendelle, along Slinge	E.J. van Nieukerken & S.B.J. Menken	1979-10-01					VU no. 79525					leafmines			RMNH			Ulmus	Ulmus		E.J. van Nieukerken & S.B.J. Menken							9709	32ULC4257	MGRS 1x1	map		51.9412	6.70135
RMNH.INS.15463	E.J. van Nieukerken	PreservedSpecimen	Stigmella ulmivora		1						Netherlands	Gelderland			Wageningen	v. Frankenhuyzen	1989-10-01	1989-10-31		l: x. 1989										RMNH	ex coll. ZMA, J.H. Kuchlein	pinned	Ulmus	Ulmus									2017-12-04
RMNH.INS.17815	E.J. van Nieukerken	PreservedSpecimen	Stigmella ulmivora				1		+	larva	Netherlands	Gelderland			Nijmegen, Winkelsteeg	H. ten Holt	2008-10-11						U-1 HTH	DNA tissue sample						RMNH	DNA extract		Ulmus											184, 425	Dutch Grid			51.817	5.815
	E.J. van Nieukerken	PreservedSpecimen	Stigmella ulmivora						+		Netherlands	Limburg			Eys, railway near Piepert	E.J. van Nieukerken et al.	1979-09-11					VU no. 79343-01					leafmines			RMNH			Ulmus	Ulmus		E.J. van Nieukerken et al.							9709	31UGS0534	MGRS 1x1	map		50.8214	5.91058
	E.J. van Nieukerken	PreservedSpecimen	Stigmella ulmivora						+		Netherlands	Limburg			Thorn, klooster Bethanien	E.J. van Nieukerken & S.B.J. Menken	1979-09-24					VU no. 79449					leafmines			RMNH			Ulmus	Ulmus		E.J. van Nieukerken & S.B.J. Menken							9709	31UFS9972	MGRS 1x1	map		51.1648	5.84633
	E.J. van Nieukerken	PreservedSpecimen	Stigmella ulmivora						+		Netherlands	Limburg			Gulpen, NW, holle weg	E.J. van Nieukerken, G. Bryan & B.J.	1979-10-08					VU no. 79604					leafmines			RMNH			Ulmus	Ulmus		E.J. van Nieukerken, G. Bryan & B.J.							9709	31UGS0333	MGRS 1x1	map		50.8131	5.88167
	E.J. van Nieukerken	PreservedSpecimen	Stigmella ulmivora						1		Netherlands	Limburg			Thorn: Baarstraat	E.J. van Nieukerken	1988-10-03					EvN no 88134					leafmines		reared from larva	RMNH			Ulmus	Ulmus		E.J. van Nieukerken										map		51.1648	5.84633
RMNH.INS.15442	E.J. van Nieukerken	PreservedSpecimen	Stigmella ulmivora	1							Netherlands	Noord-Brabant			Breda	Heylaerts			v.1877				Cat. No 6			Nepticula ulmivora				RMNH	Coll. Heylaerts	pinned											2017-12-04
RMNH.INS.15443	E.J. van Nieukerken	PreservedSpecimen	Stigmella ulmivora		1						Netherlands	Noord-Brabant			Breda	Heylaerts			v.1877				Cat. No 7			Nepticula ulmivora				RMNH	Coll. Heylaerts	pinned											2017-12-04
RMNH.INS.15444	E.J. van Nieukerken	PreservedSpecimen	Stigmella ulmivora	1							Netherlands	Noord-Brabant			Breda	Heylaerts			v.1877				Cat. No 9			Nepticula ulmivora				RMNH	Coll. Heylaerts	pinned											2017-12-04
RMNH.INS.15445	E.J. van Nieukerken	PreservedSpecimen	Stigmella ulmivora		1						Netherlands	Noord-Brabant			Breda	Heylaerts			v.1877				Cat. No 10			Nepticula ulmivora				RMNH	Coll. Heylaerts	pinned											2017-12-04
RMNH.INS.15446	E.J. van Nieukerken	PreservedSpecimen	Stigmella ulmivora		1						Netherlands	Noord-Brabant			Breda	Heylaerts			5.1878				Cat. No 12			Nepticula ulmivora				RMNH	Coll. Heylaerts	pinned											2017-12-04
RMNH.INS.15447	E.J. van Nieukerken	PreservedSpecimen	Stigmella ulmivora			3					Netherlands	Noord-Brabant			Breda	Heylaerts			5.1878				Cat. No 13	damaged specimens		Nepticula ulmivora				RMNH	Coll. Heylaerts	pinned, 3 on 1 mount											2017-12-04
RMNH.INS.15452	E.J. van Nieukerken	PreservedSpecimen	Stigmella ulmivora		1						Netherlands	Noord-Brabant			Breda	Heylaerts			e.l. 10/6 1877				Cat. No 5	left forewing missing		Nepticula ulmivora				RMNH	Coll. Heylaerts	pinned		Acer pseudop.	[probably cocoon found on trunk, note EvN]								2017-12-04
RMNH.INS.15453	E.J. van Nieukerken	PreservedSpecimen	Stigmella ulmivora		1						Netherlands	Noord-Brabant			Breda	Heylaerts			v.1877							Nepticula ulmivora Fologne Bentinck det. In Bentinck Coll. 3/4				RMNH	coll. Bentinck	pinned											8512
RMNH.INS.15456	E.J. van Nieukerken	PreservedSpecimen	Stigmella ulmivora	2	1						Netherlands	Noord-Brabant			[Breda]	Heylaerts			e.l. 25/6							Nepticula ulmivora				RMNH	Coll. Heylaerts	pinned											2017-12-04
RMNH.INS.15455	E.J. van Nieukerken	PreservedSpecimen	Stigmella ulmivora		1						Netherlands	Noord-Holland			Overveen	G.A. Bentinck	1929-06-07									Nepticula ulmivora Fologne Bentinck det. In Bentinck Coll. 4/4				RMNH	coll. Bentinck	pinned											8512
RMNH.INS.15454	E.J. van Nieukerken	PreservedSpecimen	Stigmella ulmivora	1							Netherlands	Noord-Holland			Overveen	G. Bentinck	1929-07-01									Nepticula ulmivora Fologne Bentinck det. In Bentinck Coll. 1/4				RMNH	coll. Bentinck	pinned					JT033		Male genitalia	Euparal	Jin Tao		0105	31UFU0906	MGRS	GAZET NL		52.393	4.602
RMNH.INS.15461	E.J. van Nieukerken	PreservedSpecimen	Stigmella ulmivora		1						Netherlands	Noord-Holland			Bussum	A. Diakonoff	1934-04-16													RMNH		pinned											2017-12-04
RMNH.INS.15457	E.J. van Nieukerken	PreservedSpecimen	Stigmella ulmivora		1						Netherlands	Noord-Holland			Amsterdam	A. Diakonoff	1937-08-02												light collected	RMNH		pinned					JT046		Female genitalia	Euparal	Jin Tao		0105	31UFU2904	MGRS	GAZET NL		52.371	4.895
RMNH.INS.15458	E.J. van Nieukerken	PreservedSpecimen	Stigmella ulmivora	1							Netherlands	Noord-Holland			Amsterdam, Koloniaal instituut	[A. Diakonoff]	1937-08-07											lichtbak	light collected	RMNH		pinned					JT029		Male genitalia	Euparal	Jin Tao		0105
RMNH.INS.15464	E.J. van Nieukerken	PreservedSpecimen	Stigmella ulmivora	1							Netherlands	Noord-Holland			Hilversum	C. Doets	1942-08-01	1942-10-31		1943-06-04										RMNH	verzameling C. Doets	pinned	Ulmus	Ulmus		C. Doets							2017-12-04
RMNH.INS.15465	E.J. van Nieukerken	PreservedSpecimen	Stigmella ulmivora	1							Netherlands	Noord-Holland			Hilversum	C. Doets	1942-08-01	1942-10-31		1943-06-04										RMNH	verzameling C. Doets	pinned	Ulmus	Ulmus		C. Doets							2017-12-04
RMNH.INS.15466	E.J. van Nieukerken	PreservedSpecimen	Stigmella ulmivora	1							Netherlands	Noord-Holland			Hilversum	C. Doets	1942-08-01	1942-10-31		1943-06-05										RMNH	verzameling C. Doets	pinned	Ulmus	Ulmus		C. Doets							2017-12-04
RMNH.INS.15467	E.J. van Nieukerken	PreservedSpecimen	Stigmella ulmivora		1						Netherlands	Noord-Holland			Hilversum	C. Doets	1942-08-01	1942-10-31		1943-06-05										RMNH	verzameling C. Doets	pinned	Ulmus	Ulmus		C. Doets							2017-12-04
RMNH.INS.15468	E.J. van Nieukerken	PreservedSpecimen	Stigmella ulmivora		1						Netherlands	Noord-Holland			Hilversum	C. Doets	1942-08-01	1942-10-31		1943-06-08										RMNH	verzameling C. Doets	pinned	Ulmus	Ulmus		C. Doets							2017-12-04
RMNH.INS.15469	E.J. van Nieukerken	PreservedSpecimen	Stigmella ulmivora		1						Netherlands	Noord-Holland			Hilversum	C. Doets	1942-08-01	1942-10-31		1943-06-08										RMNH	verzameling C. Doets	pinned	Ulmus	Ulmus		C. Doets							2017-12-04
RMNH.INS.15470	E.J. van Nieukerken	PreservedSpecimen	Stigmella ulmivora	1							Netherlands	Noord-Holland			Hilversum	C. Doets	1942-08-01	1942-10-31		1943-06-09										RMNH	verzameling C. Doets	pinned	Ulmus	Ulmus		C. Doets							2017-12-04
RMNH.INS.15471	E.J. van Nieukerken	PreservedSpecimen	Stigmella ulmivora		1						Netherlands	Noord-Holland			Hilversum	C. Doets	1942-08-01	1942-10-31		1943-06-09										RMNH	verzameling C. Doets	pinned	Ulmus	Ulmus		C. Doets							2017-12-04
RMNH.INS.15472	E.J. van Nieukerken	PreservedSpecimen	Stigmella ulmivora	1							Netherlands	Noord-Holland			Hilversum	C. Doets	1942-08-01	1942-10-31		1943-06-12										RMNH	verzameling C. Doets	pinned	Ulmus	Ulmus		C. Doets							2017-12-04
RMNH.INS.15473	E.J. van Nieukerken	PreservedSpecimen	Stigmella ulmivora	1							Netherlands	Noord-Holland			Hilversum	C. Doets	1942-08-01	1942-10-31		1943-06-14										RMNH	verzameling C. Doets	pinned	Ulmus	Ulmus		C. Doets							2017-12-04
RMNH.INS.15474	E.J. van Nieukerken	PreservedSpecimen	Stigmella ulmivora		1						Netherlands	Noord-Holland			Hilversum	C. Doets	1942-08-01	1942-10-31		1943-06-14										RMNH	verzameling C. Doets	pinned	Ulmus	Ulmus		C. Doets							2017-12-04
RMNH.INS.15475	E.J. van Nieukerken	PreservedSpecimen	Stigmella ulmivora		1						Netherlands	Noord-Holland			Hilversum	C. Doets	1942-08-01	1942-10-31		1943-06-21										RMNH	verzameling C. Doets	pinned	Ulmus	Ulmus		C. Doets							2017-12-04
RMNH.INS.15476	E.J. van Nieukerken	PreservedSpecimen	Stigmella ulmivora		1						Netherlands	Noord-Holland			Hilversum	C. Doets	1942-08-01	1942-10-31		1943-06-21										RMNH	verzameling C. Doets	pinned	Ulmus	Ulmus		C. Doets							2017-12-04
RMNH.INS.15477	E.J. van Nieukerken	PreservedSpecimen	Stigmella ulmivora		1						Netherlands	Noord-Holland			Hilversum	C. Doets	1942-08-01	1942-10-31		1943-06-24										RMNH	verzameling C. Doets	pinned	Ulmus	Ulmus		C. Doets							2017-12-04
RMNH.INS.22383	E.J. van Nieukerken	PreservedSpecimen	Stigmella ulmivora		1						Netherlands	Noord-Holland			Hilversum	C. Doets	1942-08-01	1942-10-31		1943-06-09										RMNH	verzameling C. Doets	pinned	Ulmus	Ulmus		C. Doets	VU2383		Female genitalia	Euparal			2017-12-04
RMNH.INS.15483	E.J. van Nieukerken	PreservedSpecimen	Stigmella ulmivora		1						Netherlands	Noord-Holland			Amsterdam N.W.	L. Vári	1942-08-16									S. ulmivora Fol.				RMNH	ex coll. ZMA		Ulmus	Ulmus		L. Vári							2017-12-04
RMNH.INS.15478	E.J. van Nieukerken	PreservedSpecimen	Stigmella ulmivora		1						Netherlands	Noord-Holland			Hilversum	C. Doets	1944-08-01	1944-10-31		1945-05-29										RMNH	verzameling C. Doets	pinned	Ulmus	Ulmus		C. Doets							2017-12-04
RMNH.INS.15479	E.J. van Nieukerken	PreservedSpecimen	Stigmella ulmivora		1						Netherlands	Noord-Holland			Hilversum	C. Doets	1944-08-01	1944-10-31		1945-06-04										RMNH	verzameling C. Doets	pinned	Ulmus	Ulmus		C. Doets							2017-12-04
RMNH.INS.15480	E.J. van Nieukerken	PreservedSpecimen	Stigmella ulmivora		1						Netherlands	Noord-Holland			Hilversum	C. Doets	1944-08-01	1944-10-31		1945-06-06										RMNH	verzameling C. Doets	pinned	Ulmus	Ulmus		C. Doets							2017-12-04
RMNH.INS.21638	E.J. van Nieukerken	PreservedSpecimen	Stigmella ulmivora		1						Netherlands	Noord-Holland			Hilversum	C. Doets	1944-08-01	1944-10-31		1945-05-17										RMNH	verzameling C. Doets	pinned	Ulmus	Ulmus		C. Doets			Female genitalia	Euparal	K. Alders	ii.1983	2017-12-04
RMNH.INS.15500	E.J. van Nieukerken	PreservedSpecimen	Stigmella ulmivora		1						Netherlands	Noord-Holland			Amsterdam N.W.	L. Vári	1948-06-06													RMNH	ex coll. ZMA		Ulmus	Ulmus		L. Vári	JCK8618		Female genitalia	Euparal	JC Koster		2017-12-04
RMNH.INS.20440	E.J. van Nieukerken	PreservedSpecimen	Stigmella ulmivora	1							Netherlands	Noord-Holland			Castricum, heg langs weg	G. Bryan	1979-08-15			1980-06-13		VU no. 79209	ZMA.INS.900410				leafmines			RMNH	ex coll. ZMA	pinned	Ulmus	Ulmus		G. Bryan	VU0440		Male genitalia	Euparal	JW Schoorl	vi.1981	2017-12-04	31UFU1223	MGRS 1x1	map		52.5455	4.65166
	E.J. van Nieukerken	PreservedSpecimen	Stigmella ulmivora						+		Netherlands	Noord-Holland			Castricum, heg langs weg	G. Bryan	1979-08-15					VU no. 79209					leafmines			RMNH			Ulmus	Ulmus		G. Bryan							9709	31UFU1223	MGRS 1x1	map		52.5455	4.65166
	E.J. van Nieukerken	PreservedSpecimen	Stigmella ulmivora						+		Netherlands	Noord-Holland			Castricum, heg langs weg	G. Bryan	1979-08-15					VU no. 79209					leafmines			RMNH			Ulmus	Ulmus		G. Bryan							9709	31UFU1223	MGRS 1x1	map		52.5455	4.65166
	E.J. van Nieukerken	PreservedSpecimen	Stigmella ulmivora						+		Netherlands	Noord-Holland			Amstelveen, Beneluxbaan, median reserve	E.J. van Nieukerken	1979-09-21					VU no. 79443					leafmines			RMNH			Ulmus	Ulmus		E.J. van Nieukerken							9709	31UFT2798	MGRS 1x1	map		52.3176	4.86325
RMNH.INS.15460	E.J. van Nieukerken	PreservedSpecimen	Stigmella ulmivora		1						Netherlands	Noord-Holland			Amsterdam	L. Vári				1943-08-02										RMNH	verzameling C. Doets	pinned	Ulmus	Ulmus									2017-12-04
RMNH.INS.15462	E.J. van Nieukerken	PreservedSpecimen	Stigmella ulmivora		1						Netherlands	Noord-Holland			Amsterdam				e.p. 30.6.1929	1929-06-30							uit iepenschouw			RMNH	ex coll. ZMA	pinned	Ulmus	Ulmus									2017-12-04
RMNH.INS.15482	E.J. van Nieukerken	PreservedSpecimen	Stigmella ulmivora		1						Netherlands	Noord-Holland			Amsterdam	L. Vári				1942-04-27						S. ulmicola Her.			reared from larva	RMNH	ex coll. ZMA		Ulmus	Ulmus		L. Vári							2017-12-04
RMNH.INS.15484	E.J. van Nieukerken	PreservedSpecimen	Stigmella ulmivora		1						Netherlands	Noord-Holland			Amsterdam	L. Vári				1943-07-29						S. ulmifoliae Her.			reared from larva	RMNH	ex coll. ZMA		Ulmus	Ulmus		L. Vári							2017-12-04
RMNH.INS.15485	E.J. van Nieukerken	PreservedSpecimen	Stigmella ulmivora		1						Netherlands	Noord-Holland			Amsterdam	L. Vári				1943-07-30									reared from larva	RMNH	ex coll. ZMA		Ulmus	Ulmus		L. Vári							2017-12-04
RMNH.INS.15486	E.J. van Nieukerken	PreservedSpecimen	Stigmella ulmivora		1						Netherlands	Noord-Holland			Amsterdam	L. Vári				1943-07-31									reared from larva	RMNH	ex coll. ZMA		Ulmus	Ulmus		L. Vári							2017-12-04
RMNH.INS.15487	E.J. van Nieukerken	PreservedSpecimen	Stigmella ulmivora		1						Netherlands	Noord-Holland			Amsterdam	L. Vári				1943-08-02									reared from larva	RMNH	ex coll. ZMA		Ulmus	Ulmus		L. Vári							2017-12-04
RMNH.INS.15488	E.J. van Nieukerken	PreservedSpecimen	Stigmella ulmivora		1						Netherlands	Noord-Holland			Amsterdam N.W.	L. Vári				1947-08-02									reared from larva	RMNH	ex coll. ZMA		Ulmus	Ulmus		L. Vári							2017-12-04
RMNH.INS.15489	E.J. van Nieukerken	PreservedSpecimen	Stigmella ulmivora		1						Netherlands	Noord-Holland			Amsterdam N.W.	L. Vári				1947-08-02									reared from larva	RMNH	ex coll. ZMA		Ulmus	Ulmus		L. Vári							2017-12-04
RMNH.INS.15490	E.J. van Nieukerken	PreservedSpecimen	Stigmella ulmivora		1						Netherlands	Noord-Holland			Amsterdam N.W.	L. Vári				1947-08-05									reared from larva	RMNH	ex coll. ZMA		Ulmus	Ulmus		L. Vári							2017-12-04
RMNH.INS.15491	E.J. van Nieukerken	PreservedSpecimen	Stigmella ulmivora		1						Netherlands	Noord-Holland			Amsterdam N.W.	L. Vári				1947-08-14									reared from larva	RMNH	ex coll. ZMA		Ulmus	Ulmus		L. Vári							2017-12-04
RMNH.INS.15492	E.J. van Nieukerken	PreservedSpecimen	Stigmella ulmivora		1						Netherlands	Noord-Holland			Amsterdam N.W.	L. Vári				1948-06-11						N. ulmifoliae			reared from larva	RMNH	ex coll. ZMA		Ulmus	Ulmus		L. Vári							2017-12-04
RMNH.INS.20415	E.J. van Nieukerken	PreservedSpecimen	Stigmella ulmivora	1							Netherlands	Noord-Holland			Amsterdam N.W.	L. Vári				1947-08-03			ZMA.INS.900411						reared from larva	RMNH	ex coll. ZMA		Ulmus	Ulmus		L. Vári	VU0415		Male genitalia	Euparal	JW Schoorl	1980-09-19	2017-12-04
RMNH.INS.41697	E.J. van Nieukerken	PreservedSpecimen	Stigmella ulmivora						several		Netherlands	Overijssel			Weerribben, Ossenzijl, Venebosch	E.J. van Nieukerken	2011-08-27					EvN no 2011136-1H					leafmines	planted forest in fen area		RMNH	vacated mines	small envelope	Ulmus	Ulmus		E.J. van Nieukerken							2017-01-19			Google Earth	WGS84	52.806	5.9345
RMNH.INS.42783	E.J. van Nieukerken	PreservedSpecimen	Stigmella ulmivora						several	vacated mines	Netherlands	Zeeland			Middelburg N., Brigdamseweg	C. Doorenweerd	2009-08-02					EvN no 2009904-1H					leafmines	hedges		RMNH	vacated mines	small envelope	Ulmus	Ulmus		E.J. van Nieukerken							0907			google earth	WGS84	51.5179	3.61592
RMNH.INS.41469	E.J. van Nieukerken	PreservedSpecimen	Stigmella ulmivora						1	larva	Netherlands	Zuid-Holland			Den Haag, Waalsdorpervlakte	E.J. van Nieukerken	2007-10-07 15:07:00					EvN no 2007115-M	RMNH.INS.12622				leafmines	dune valley forest		RMNH	larva barcoded	small envelope	Ulmus	Ulmus		E.J. van Nieukerken							0804			GPS	WGS84	52.1134	4.33146
RMNH.INS.15450	E.J. van Nieukerken	PreservedSpecimen	Stigmella ulmivora	1							Netherlands	Zuid-Holland			Rottm. [Rotterdam]	Snellen	1901-06-22		22/6 1901					head & left forewing missing		Nepticula aceris der Snellen, Stigmella speciosa det EJ van Nieukerken 1981, ulmivora det EJvN 1987	uit de pop		reared from pupa	RMNH	Coll. Snellen	pinned + cocoon					V.607		Male genitalia		L. Vári		2017-12-04
	E.J. van Nieukerken	PreservedSpecimen	Stigmella ulmivora						+		Netherlands	Zuid-Holland			Leiden W, experimental garden University	E.J. van Nieukerken	1979-07-05					VU no. 79093					leafmines			RMNH			Ulmus	Ulmus		E.J. van Nieukerken							9709	31UET9980	MGRS 1x1	map		52.1616	4.44734
	E.J. van Nieukerken	PreservedSpecimen	Stigmella ulmivora						+		Netherlands	Zuid-Holland			Leiden W, experimental garden University	S.B.J. Menken	1979-09-05					VU no. 79302					leafmines			RMNH			Ulmus	Ulmus		S.B.J. Menken							9709	31UET9980	MGRS 1x1	map		52.1616	4.44734
	E.J. van Nieukerken	PreservedSpecimen	Stigmella ulmivora						+		Netherlands	Zuid-Holland			Wassenaar, Meijendel, near Kijfhoek	E.J. van Nieukerken	1979-09-18					VU no. 79419					leafmines			RMNH			Ulmus	Ulmus		E.J. van Nieukerken							9709	31UET9276	MGRS 1x1	map		52.1269	4.34395
RMNH.INS.12193	E.J. van Nieukerken	PreservedSpecimen	Stigmella ulmivora				1			larva	Netherlands	Zuid-Holland			Oegstgeest, Rhijngeest	E.J. van Nieukerken	1997-09-23					EvN no 97129-1					leafmines			RMNH	larva collection	ethanol 70	Ulmus	Ulmus		E.J. van Nieukerken							0210	91.4-465.6	Dutch Grid		ED50	52.1767	4.45953
RMNH.INS.15459	E.J. van Nieukerken	PreservedSpecimen	Stigmella ulmivora		1						Netherlands	Zuid-Holland			Lexmond	C. Gielis	1999-08-03												light collected	RMNH	acq. 549	pinned											0600	51.57.51N-5.2.2E	Degrees minutes seconds	label		51.9501	5.0339
RMNH.INS.12622	E.J. van Nieukerken	PreservedSpecimen	Stigmella ulmivora				1		+	green larva	Netherlands	Zuid-Holland			Den Haag, Waalsdorpervlakte	E.J. van Nieukerken	2007-10-07 15:07:00					EvN no 2007115-M		larva - left mine			leafmines	dune valley forest		RMNH	DNA extract		Ulmus	Ulmus		E.J. van Nieukerken							0804			GPS	WGS84	52.1134	4.33146
RMNH.INS.15441	E.J. van Nieukerken	PreservedSpecimen	Stigmella ulmivora	1							Netherlands	Zuid-Holland			Rottm. [Rotterdam]		13-07-1870		13/7 70				Cat. No 4	right wings in capsule		Nepticula ulmivora	el		reared from larva	RMNH	Coll. Snellen	pinned											2017-12-04
RMNH.INS.15449	E.J. van Nieukerken	PreservedSpecimen	Stigmella ulmivora		1						Netherlands	Zuid-Holland			Rottm. [Rotterdam]	Snellen	1-4-1879	30-4-1879	pop in 4, e. 21/7 79	21-07-1879						Nepticula aceris der Snellen, Stigmella speciosa det EJ van Nieukerken 1981, ulmivora det EJvN 1987				RMNH	Coll. Snellen	pinned		Acer	[cocoon found on trunk, note EvN]								2017-12-04
RMNH.INS.15448	E.J. van Nieukerken	PreservedSpecimen	Stigmella ulmivora	1							Netherlands	Zuid-Holland			Rottm. [Rotterdam]	Snellen	21-06-1877		21/6 77							Nepticula aceris der Snellen, Stigmella speciosa det EJ van Nieukerken 1981, ulmivora det EJvN 1987				RMNH	Coll. Snellen	pinned											2017-12-04
RMNH.INS.21769	E.J. van Nieukerken	PreservedSpecimen	Stigmella ulmivora		1						Netherlands	Zuid-Holland			Rottm. [Rotterdam]	Snellen	27-05-1877		27/5 77				Cat. No 2	det Hans van Driel 7-x-1983		Nepticula aceris der Snellen, Stigmella speciosa det EJ van Nieukerken 1981, ulmivora det HvDriel 1983				RMNH	Coll. Snellen	pinned		Acer	[probably found on trunk, note EvN]		VU1769		Female genitalia	Euparal	R. Kloos	xi.1982	2017-12-04
RMNH.INS.15439	E.J. van Nieukerken	PreservedSpecimen	Stigmella ulmivora		1						Netherlands	Zuid-Holland			Den Haag				10/6 65	10-06-1865			Cat. No 1			Nepticula ulmivora	ex larva		reared from larva	RMNH	Coll. Snellen	pinned + cocoon											2017-12-04
RMNH.INS.15440	E.J. van Nieukerken	PreservedSpecimen	Stigmella ulmivora		1						Netherlands	Zuid-Holland			Den Haag				29/5 65	29-05-1865			Cat. No 2			Nepticula ulmivora	el		reared from larva	RMNH	Coll. Snellen	pinned + cocoon											2017-12-04
RMNH.INS.15481	E.J. van Nieukerken	PreservedSpecimen	Stigmella ulmivora		1						Netherlands	Zuid-Holland			s Gravenhage	Snellen				29 mei										RMNH	ex coll. ZMA, coll. Dr J. Th. Oudemans	pinned											2017-12-04
RMNH.INS.22382	E.J. van Nieukerken	PreservedSpecimen	Stigmella ulmivora	1							Netherlands	Zuid-Holland			Rottm. [Rotterdam]				24/6 64	24-06-1864			Cat. No 3			Nepticula ulmivora	el		reared from larva	RMNH	Coll. Snellen	pinned + cocoon					VU2382		Male genitalia	Euparal			2017-12-04
NHMO-DAR-13660	Kai Berggren	PreservedSpecimen	Stigmella ulmivora				1			larva	Norway	Aust-Agder	Birkenes		Bjorvann	Kai Berggren	2017-06-13							Data from BOLD						Research Collection of Kai Berggren																		58.2871	8.13783
NHMO-DAR-5927	Kai Berggren	PreservedSpecimen	Stigmella ulmivora				1			larva	Norway	Vest-Agder	Kristiansand		Aurebekk	Kai Berggren	2010-06-19							Data from BOLD						University of Oslo, Natural History Museum																		58.201	7.871
RMNH.INS.15493	E.J. van Nieukerken	PreservedSpecimen	Stigmella ulmivora	1							Poland	Silesia			Wroclaw (Breslau)	[Wocke]			iii.1882							Nepticula ulmivora Fologne Bentinck det. In Bentinck Coll. 1/4			reared from larva	RMNH	coll. Bentinck												8512
	E.J. van Nieukerken	PreservedSpecimen	Stigmella ulmivora						1	vacated	Portugal	Tras-os-Montes			PN Montesinho, Salgueiros, Vallone das Furnas, 8 km N Vinhais	E.J. van Nieukerken	2001-07-30					EvN no 2001118-H					leafmines	Quercus pyrenaica forest, stream valley		RMNH			Ulmus	Ulmus		E.J. van Nieukerken							0304		Decimal degrees	GPS	WGS84	41.9055	-7.02945
RMNH.INS.41634	E.J. van Nieukerken	PreservedSpecimen	Stigmella ulmivora						a few		Romania	Brasov			Brașov, Mt. Tâmpa	E.J. van Nieukerken	2011-08-02					EvN no 2011108-H					leafmines	mixed limestone forest and shrub		RMNH	vacated mines	small envelope	Ulmus	Ulmus		E.J. van Nieukerken							2017-01-18			GPS Dakota	WGS84	45.6346	25.5932
	E.J. van Nieukerken	PreservedSpecimen	Stigmella ulmivora						1		Russia	Tula	Belyov		Nikolo-Gastun	L.V. Bolshakov	2009-07-25													RMNH			Ulmus	Ulmus		E.J. van Nieukerken							2013/06
	E.J. van Nieukerken	PreservedSpecimen	Stigmella ulmivora						1		Russia	Tula	Belyov		Volod'kovo	L.V. Bolshakov	2009-10-05													RMNH			Ulmus	Ulmus		E.J. van Nieukerken							2013/06
	E.J. van Nieukerken	PreservedSpecimen	Stigmella ulmivora								Russia	Tula	Kimovsk		Tatinki	L.V. Bolshakov	2009-08-14													RMNH			Ulmus	Ulmus		E.J. van Nieukerken							2013/06
	E.J. van Nieukerken	PreservedSpecimen	Stigmella ulmivora								Russia	Tula	Kimovsk		Kulikovka	L.V. Bolshakov	2009-09-07													RMNH			Ulmus	Ulmus		E.J. van Nieukerken							2013/06
	E.J. van Nieukerken	PreservedSpecimen	Stigmella ulmivora						3		Russia	Tula	Kurkino		Vodyanoe Pole	L.V. Bolshakov	2009-07-17													RMNH			Ulmus	Ulmus		E.J. van Nieukerken							2013/06
	E.J. van Nieukerken	PreservedSpecimen	Stigmella ulmivora						2		Russia	Tula	Suvorov		Platovo	L.V. Bolshakov	2009-08-12													RMNH			Ulmus	Ulmus		E.J. van Nieukerken							2013/06
	E.J. van Nieukerken	PreservedSpecimen	Stigmella ulmivora						2		Russia	Tula	Tula		Central Park	L.V. Bolshakov	2009-08-31													RMNH			Ulmus	Ulmus		E.J. van Nieukerken							2013/06
	E.J. van Nieukerken	PreservedSpecimen	Stigmella ulmivora								Russia	Tula			Kosaya Gora, 10 km S Tula	L.V. Bolshakov	2009-08-01													RMNH			Ulmus	Ulmus		E.J. van Nieukerken							2013/06
	E.J. van Nieukerken	PreservedSpecimen	Stigmella ulmivora						3		Russia	Ul'yanovsk			Ul'yanovsk city	stud ULGPU	2002-09-09											leafmines		RMNH			Ulmus										0302	54.18-48.23	Degrees Minutes			54.3	48.38
	E. Requeña	PreservedSpecimen	Stigmella ulmivora	1							Spain	Barcelona			Anoia: Bellprat	E. Requeña Miret	2001-06-30							data received from E. Requeña, 2-2002						Requeña Miret, E., personal collection							ER412		Male genitalia		E. Requeña Miret			31TCF69	MGRS			41.45	1.32
	E.J. van Nieukerken	PreservedSpecimen	Stigmella ulmivora						+		Spain	Granada			Sierra Nevada, Pitres	J.W. Schoorl	1988-11-20											leafmines		RMNH			Ulmus										9501	30SVF78	MGRS	geonames		36.87	-3.34
	E.J. van Nieukerken	PreservedSpecimen	Stigmella ulmivora						1	vacated	Spain	Sevilla			Sevilla	E.J. van Nieukerken	2001-01-10					EvN no 2001051-H						in town		RMNH			Ulmus	Ulmus		E.J. van Nieukerken							0304	37.21.35N-5.58.56W	DMS	Map	WGS84	37.3565	-5.98409
RMNH.INS.42264	E.J. van Nieukerken	PreservedSpecimen	Stigmella ulmivora						several		Sweden	Bohuslan			Svenneby, Valön Nature Reserve	E.J. van Nieukerken	2008-08-07 12:08:00					EvN no 2008063-H					leafmines	coastal area on granite		RMNH	vacated mines	small envelope	Ulmus	Ulmus		E.J. van Nieukerken							0808			GPS	WGS84	58.4956	11.299
	C. Eiseman	PhotoRecord	Stigmella apicialbella						1		Canada	New Brunswick	York County		Fredericton	Christopher Adam	2015-08-28																Ulmus	Ulmus									2018-05-22			Google Earth	WGS84	45.901	-66.577
CNC	E.J. van Nieukerken	PreservedSpecimen	Stigmella apicialbella						several		Canada	Québec	Brome-Missisquoi	St Armand	Étang Streit	E.J. van Nieukerken	2015-09-07					EvN no 2015228-2H					leafmines	hardwood forest near marsh		CNC	vacated mines	large envelope	Ulmus americana	Ulmus americana		E.J. van Nieukerken										GPS Dakota	WGS84	45.022	-73.0799
RMNH.INS.30802	E.J. van Nieukerken	PreservedSpecimen	Stigmella apicialbella				1			larva	Canada	Québec	Brome-Missisquoi	St Armand	Étang Streit	E.J. van Nieukerken	2015-09-07					EvN no 2015228-2M		taken from mine			leafmines	hardwood forest near marsh		RMNH	larval slide + DNA extract		Ulmus americana	Ulmus americana		E.J. van Nieukerken	RMNH.INS.30802.P		larval skin	Euparal	Camiel Doorenweerd					GPS Dakota	WGS84	45.022	-73.0799
RMNH.INS.40376	E.J. van Nieukerken	PreservedSpecimen	Stigmella apicialbella						several		Canada	Québec	Brome-Missisquoi	St Armand	Étang Streit	E.J. van Nieukerken	2015-09-07					EvN no 2015228-2H					leafmines	hardwood forest near marsh		RMNH	vacated mines	small envelope	Ulmus americana	Ulmus americana		E.J. van Nieukerken										GPS Dakota	WGS84	45.022	-73.0799
RMNH.INS.40377	E.J. van Nieukerken	PreservedSpecimen	Stigmella apicialbella						1	larva	Canada	Québec	Brome-Missisquoi	St Armand	Étang Streit	E.J. van Nieukerken	2015-09-07					EvN no 2015228-2M	RMNH.INS.30802				leafmines	hardwood forest near marsh		RMNH	larva barcoded	small envelope	Ulmus americana	Ulmus americana		E.J. van Nieukerken										GPS Dakota	WGS84	45.022	-73.0799
CNCLEP00122124	E.J. van Nieukerken	PreservedSpecimen	Stigmella apicialbella		1					adult	Canada	Québec	Gatineau	Aylmer	18 rue Washington	B. Landry	1998-05-19										MVL		light collected	CNC		drawer Nept_4											06/2015		decimal degrees	google earth	WGS84	45.3973	-75.8418
RMNH.INS.43261	E.J. van Nieukerken	PreservedSpecimen	Stigmella apicialbella						several		United States	Alabama	Monroe Co.	Haines Island Park	along Alabama River	E.J. van Nieukerken & C. Doorenweerd	2010-10-12					EvN no 2010237-1H					leafmines	pine forest and hardwood along river		RMNH	vacated mines	small envelope	Ulmus	Ulmus		E.J. van Nieukerken							2017-03-29			GPS Dakota	WGS84	31.7251	-87.4691
RMNH.INS.43576	E.J. van Nieukerken	PreservedSpecimen	Stigmella apicialbella						several		United States	Connecticut	Litchfield Co	Canaan	Page Road near Falls Village	E.J. van Nieukerken	2011-09-11					EvN no 2011206-H					leafmines	swamp forest at roadsie		RMNH	vacated mines	Small envelope	Ulmus americana	Ulmus americana		E.J. van Nieukerken							2017-08-10			GPS Dakota	WGS84	41.9651	-73.3544
RMNH.INS.43293	E.J. van Nieukerken	PreservedSpecimen	Stigmella apicialbella						8		United States	Georgia	Murray Co.	Chattahoochee Nat. Forest	E of Chatsworth, GA rd 52	E.J. van Nieukerken & C. Doorenweerd	2010-10-14					EvN no 2010265-H					leafmines	hardwood forest along highway		RMNH	vacated mines	small envelope	Ulmus alata	Ulmus alata		E.J. van Nieukerken							2017-03-30			GPS Dakota	WGS84	34.7407	-84.7185
	E.J. van Nieukerken	PreservedSpecimen	Stigmella apicialbella	1							United States	Indiana	St. Joseph Co.		St. Joseph County	J. Vargo	2010-05-25													MEM													1505	N 41.37'46.2"-W 86.08'13.9"	Degrees Minutes Seconds	label		41.6295	-86.1372
	E.J. van Nieukerken	PreservedSpecimen	Stigmella apicialbella	1							United States	Indiana	St. Joseph Co.		St. Joseph County	J. Vargo	2010-08-13													MEM							JCK8421		Male genitalia	euparal	JC Koster	2016-05-25	1505	N 41.37'46.2"-W 86.08'13.9"	Degrees Minutes Seconds	label		41.6295	-86.1372
RMNH.INS.24743	E.J. van Nieukerken	PreservedSpecimen	Stigmella apicialbella	1							United States	Indiana	St. Joseph Co.		St. Joseph County	J. Vargo	2010-08-15							+ DNA						RMNH							EvN4743		Male genitalia	Euparal	E.J. van Nieukerken	2015-05-12	1505	N 41.37'46.2"-W 86.08'13.9"	Degrees Minutes Seconds	label		41.6295	-86.1372
	E.J. van Nieukerken	PreservedSpecimen	Stigmella apicialbella	2							United States	Indiana	St. Joseph Co.		St. Joseph County	J. Vargo	2010-08-15													MEM													1505	N 41.37'46.2"-W 86.08'13.9"	Degrees Minutes Seconds	label		41.6295	-86.1372
	E.J. van Nieukerken	PreservedSpecimen	Stigmella apicialbella	1							United States	Kentucky	Kenton Co.		[Covington]									Type no 523 USNM	Lectotype	Nepticula apicialbella				USNM							CNC3476		Male genitalia		P. Newton		0612
	E.J. van Nieukerken	PreservedSpecimen	Stigmella apicialbella								United States	Massachusetts	Hampshire Co.	Northampton	Northampton Bikeway west of King St.	C. S. Eiseman	2013-09-13		13.ix.2013	2014-04-22		CSE1096								RMNH			Ulmus	Ulmus		C. Eiseman												42.3306	-72.6404
RMNH.INS.43158	E.J. van Nieukerken	PreservedSpecimen	Stigmella apicialbella						3		United States	Mississippi	Oktibbeha Co.	Black Prairie Reserve	nr 16th Section Rd	E.J. van Nieukerken & C. Doorenweerd	2010-10-06					EvN no 2010172-2H					leafmines	prarie strip on limestone andd forest edge		RMNH	vacated mines	small envelope	Ulmus alata	Ulmus alata		E.J. van Nieukerken							2017-03-15			GPS Dakota	WGS84	33.5126	-88.7365
RMNH.INS.43181	E.J. van Nieukerken	PreservedSpecimen	Stigmella apicialbella						1		United States	Mississippi	Winston Co.	Tombigbee Nat. Forest	Noxubee Hills trailhead	E.J. van Nieukerken & C. Doorenweerd	2010-10-07					EvN no 2010187-H					leafmines	dry Pinus taeda-Quercus-Carya forest		RMNH	vacated mines	small envelope	Ulmus alata	Ulmus alata		E.J. van Nieukerken							2017-03-22			GPS Dakota	WGS84	33.21	-89.0737
RMNH.INS.43616	E.J. van Nieukerken	PreservedSpecimen	Stigmella apicialbella						2		United States	New York	Essex Co	S Wilmington	W branch Ausable river	E.J. van Nieukerken	2011-09-13					EvN no 2011227-2H					leafmines	mixed forest along river on sand		RMNH	vacated mines	Small envelope	Ulmus americana	Ulmus americana		E.J. van Nieukerken							2017-08-11			GPS Dakota	WGS84	44.3662	-73.8412
	C. Eiseman	PhotoRecord	Stigmella apicialbella				1		1		United States	North Carolina	Durham Co.	Durham	Pelham Road	Tracy S. Feldman	2016-06-25																Ulmus alata	Ulmus alata									2018-05-22			Google Earth	WGS84	35.887	-78.914
	E.J. van Nieukerken	PreservedSpecimen	Stigmella apicialbella						+		United States	Tennessee	Obion Co.		Reelfoot Lake	C. Eiseman	2012-11-17					CSE-L149								RMNH		Small envelope	Ulmus			C. Eiseman												36.3534	-89.3991
	E.J. van Nieukerken	PreservedSpecimen	Stigmella apicialbella						+		United States	Tennessee	Obion Co.		Reelfoot Lake	C. Eiseman	2012-11-17					CSE-L150								RMNH		Small envelope	Ulmus			C. Eiseman												36.3534	-89.3991
RMNH.INS.29657	E.J. van Nieukerken	PreservedSpecimen	Stigmella apicialbella				1				United States	Tennessee	Obion Co.		Reelfoot Lake	C. Eiseman	2012-11-17			see notes		CSE-TN3		larva never made cocoon; preserved 11/27						RMNH	Tissue collection -80	Freezer Box48	Ulmus			C. Eiseman												36.3534	-89.3991
RMNH.INS.18585	E.J. van Nieukerken	PreservedSpecimen	Stigmella apicialbella				1			larva	United States	Vermont	Addison Co.	Addison	Dead Creek WMA	E.J. van Nieukerken	2011-09-16					EvN no 2011262-1M		larva taken from mine			leafmines	low bushes in pond marsh area		RMNH	DNA extract		Ulmus americana	Ulmus americana		E.J. van Nieukerken										GPS Dakota	WGS84	44.0853	-73.3451
RMNH.INS.43691	E.J. van Nieukerken	PreservedSpecimen	Stigmella apicialbella						2	larva	United States	Vermont	Addison Co.	Addison	Dead Creek WMA	E.J. van Nieukerken	2011-09-16					EvN no 2011262-1M/H	RMNH.INS.18585				leafmines	low bushes in pond marsh area		RMNH	larva barcoded, vacated mine	Small envelope	Ulmus americana	Ulmus americana		E.J. van Nieukerken										GPS Dakota	WGS84	44.0853	-73.3451
RMNH.INS.40329	E.J. van Nieukerken	PreservedSpecimen	Stigmella apicialbella						1		United States	Vermont	Chittenden Co.	Burlington	Colchester Bog	E.J. van Nieukerken, C. Eiseman & J. Blyth	2015-09-05					EvN no 2015200-2H					leafmines	wet mixed forest near peat bog		RMNH	vacated mines	small envelope	Ulmus americana	Ulmus americana		E.J. van Nieukerken										GPS Dakota	WGS84	44.5472	-73.283
	C. Eiseman	PhotoRecord	Ectoedemia ulmella						1		Canada	New Brunswick	York County		Fredericton (Lincoln Trail)	Christopher Adam	2014-09-09																Ulmus	Ulmus									2018-05-22			Google Earth	WGS84	45.901	-66.577
CNCLEP00104504	Wilkinson & Scoble	PreservedSpecimen	Ectoedemia ulmella		1					larva	Canada	Ontario			Overbrook	G.G.Lewis	1955-08-07			1955-07-22		55-137A		abdomen missing						CNC		drawer Nept_9	Ulmus americana	W. Elm											decimal degrees	google earth	WGS84	45.42	-75.65
CNCLEP00123806	E.J. van Nieukerken	PreservedSpecimen	Ectoedemia ulmella						2 leafmines in 2 leaves		Canada	Ontario			Ottawa	[Freeman & Lewis]	1955-08-07		1955			C.N.C. No 55-137A								CNC	in plastic	leafmine collection	Ulmus americana	Ulmus americana									07/2015		decimal degrees	google earth	WGS84	45.41	-75.69
CNCLEP00123807	E.J. van Nieukerken	PreservedSpecimen	Ectoedemia ulmella						5 leafmines in 3 leaves		Canada	Ontario			Overbrook	[Freeman & Lewis]	1955-08-07					55-137A								CNC	in plastic	leafmine collection	Ulmus americana	Elm - white, Ulmus americana L.									07/2015		decimal degrees	google earth	WGS84	45.42	-75.65
CNCLEP00104508	Wilkinson & Scoble	PreservedSpecimen	Ectoedemia ulmella	1						larva	Canada	Ontario			La Passe	G.G.Lewis				1971-02-22		70-111A								CNC		drawer Nept_9	Ulmus americana	Ulmus americana			MIC6731	CNC3451	genitalia			GL			decimal degrees	google earth	WGS84	45.816	-76.77
CNCLEP00120553	Wilkinson & Scoble	PreservedSpecimen	Ectoedemia ulmella	1						larva	Canada	Ontario			La Passe	G.G. Lewis				1971-03-26		70-111								CNC		drawer Nept_9	Ulmus americana	Ulmus americana			MIC6727	CNC3461	genitalia			GL			decimal degrees	google earth	WGS84	45.816	-76.77
CNCLEP00120554	Wilkinson & Scoble	PreservedSpecimen	Ectoedemia ulmella		1					larva	Canada	Ontario			La Passe	G.G. Lewis				1971-02-25		70-111A								CNC		drawer Nept_9	Ulmus americana	Ulmus americana			MIC6728	CNC3452	genitalia			GL			decimal degrees	google earth	WGS84	45.816	-76.77
CNCLEP00123808	E.J. van Nieukerken	PreservedSpecimen	Ectoedemia ulmella						2 leafmines in 2 leaves	larva	Canada	Ontario			Ottawa	[Freeman & Lewis]				1955-07-28										CNC	in plastic; round label "136"	leafmine collection	Ulmus	Elm, Ulmus sp.									07/2015		decimal degrees	google earth	WGS84	45.41	-75.69
CNCLEP00123809	E.J. van Nieukerken	PreservedSpecimen	Ectoedemia ulmella						1 leafmine in 1 leaf		Canada	Ontario			La Passe	[Freeman & Lewis]			1970			C.N.C. No 70-111A								CNC	in plastic	leafmine collection	Ulmus americana	Ulmus americana									07/2015		decimal degrees	google earth	WGS84	45.816	-76.77
RMNH.INS.30804	E.J. van Nieukerken	PreservedSpecimen	Ectoedemia ulmella				1			larva	Canada	Québec	Brome-Missisquoi	St Armand	Étang Streit	E.J. van Nieukerken	2015-09-07					EvN no 2015228-1M		fresh dead larva			leafmines	hardwood forest near marsh		RMNH	Tissue collection -80	Freezer Box61	Ulmus americana	Ulmus americana		E.J. van Nieukerken										GPS Dakota	WGS84	45.022	-73.0799
RMNH.INS.30805	E.J. van Nieukerken	PreservedSpecimen	Ectoedemia ulmella				1			larva	Canada	Québec	Brome-Missisquoi	St Armand	Étang Streit	E.J. van Nieukerken	2015-09-07					EvN no 2015228-1M		fresh dead larva			leafmines	hardwood forest near marsh		RMNH	Tissue collection -80	Freezer Box61	Ulmus americana	Ulmus americana		E.J. van Nieukerken										GPS Dakota	WGS84	45.022	-73.0799
RMNH.INS.40373	E.J. van Nieukerken	PreservedSpecimen	Ectoedemia ulmella						several		Canada	Québec	Brome-Missisquoi	St Armand	Étang Streit	E.J. van Nieukerken	2015-09-07					EvN no 2015228-1H					leafmines	hardwood forest near marsh		RMNH	vacated mines	small envelope	Ulmus americana	Ulmus americana		E.J. van Nieukerken										GPS Dakota	WGS84	45.022	-73.0799
RMNH.INS.40374	E.J. van Nieukerken	PreservedSpecimen	Ectoedemia ulmella						2	larva	Canada	Québec	Brome-Missisquoi	St Armand	Étang Streit	E.J. van Nieukerken	2015-09-07					EvN no 2015228-1K					leafmines	hardwood forest near marsh		RMNH	rearing failed	small envelope	Ulmus americana	Ulmus americana		E.J. van Nieukerken										GPS Dakota	WGS84	45.022	-73.0799
RMNH.INS.40375	E.J. van Nieukerken	PreservedSpecimen	Ectoedemia ulmella						2	larva	Canada	Québec	Brome-Missisquoi	St Armand	Étang Streit	E.J. van Nieukerken	2015-09-07					EvN no 2015228-1M	RMNH.INS.30804,RMNH.INS.30805				leafmines	hardwood forest near marsh		RMNH	larvae in tissue collection	small envelope	Ulmus americana	Ulmus americana		E.J. van Nieukerken										GPS Dakota	WGS84	45.022	-73.0799
RMNH.INS.40391	E.J. van Nieukerken	PreservedSpecimen	Ectoedemia ulmella						4		Canada	Québec	Gatineau	Aylmer	Deschênes, Ottawa rivershore	E.J. van Nieukerken	2015-09-12					EvN no 2015237-H					leafmines	marshy shrub and forest near river		RMNH	vacated mines	small envelope	Ulmus rubra	Ulmus rubra		E.J. van Nieukerken										GPS Dakota	WGS84	45.3815	-75.8135
CNCLEP00120564	E.J. van Nieukerken	PreservedSpecimen	Ectoedemia ulmella		1					adult	Canada	Québec			Knowlton	J. McDunnough	1929-07-01									ochrefasciella				CNC		drawer Nept_9					MIC6737	CNC3364	genitalia			GL	06/2015		decimal degrees	google earth	WGS84	45.22	-72.51
CNCLEP00104507	Wilkinson & Scoble	PreservedSpecimen	Ectoedemia ulmella	1						larva	Canada	Québec			Kingsmere	G.G.Lewis	1955-09-10			1956-07-14		55-279		metathorax and abdomen missing						CNC		drawer Nept_9	Ulmus rubra	Ulmus fulva											decimal degrees	google earth	WGS84	45.489	-75.845
CNCLEP00120550	Wilkinson & Scoble	PreservedSpecimen	Ectoedemia ulmella		1					larva	Canada	Québec			Kingsmere	G.G. Lewis	1955-09-10			1956-05-12		55-279								CNC		drawer Nept_9	Ulmus rubra	Ulmus fulva			MIC6724	CNC3389	genitalia			GL			decimal degrees	google earth	WGS84	45.489	-75.845
CNCLEP00120551	Wilkinson & Scoble	PreservedSpecimen	Ectoedemia ulmella	1						larva	Canada	Québec			Kingsmere	G.G. Lewis	1955-09-10			1956-07-17		55-279								CNC		drawer Nept_9	Ulmus rubra	Ulmus fulva			MIC6725	CNC3352	genitalia			GL			decimal degrees	google earth	WGS84	45.489	-75.845
CNCLEP00120552	Wilkinson & Scoble	PreservedSpecimen	Ectoedemia ulmella		1					larva	Canada	Québec			Kingsmere	G.G. Lewis	1955-09-10			1956-07-12		55-279								CNC		drawer Nept_9	Ulmus rubra	Ulmus fulva			MIC6726	CNC3354	genitalia			GL			decimal degrees	google earth	WGS84	45.489	-75.845
CNCLEP00120555	Wilkinson & Scoble	PreservedSpecimen	Ectoedemia ulmella		1					larva	Canada	Québec			Kingsmere	G.G. Lewis	1955-09-10			1956-07-14		55-279		abdomen missing						CNC		drawer Nept_9	Ulmus rubra	Ulmus fulva											decimal degrees	google earth	WGS84	45.489	-75.845
CNCLEP00123811	E.J. van Nieukerken	PreservedSpecimen	Ectoedemia ulmella						3 leafmines in 2 leaves		Canada	Québec			Kingsmere	[Freeman & Lewis]	1955-09-10					55-279								CNC	in plastic; round label "24"	leafmine collection	Ulmus rubra	Elm (slippery), Ulmus fulva Michx.									07/2015		decimal degrees	google earth	WGS84	45.489	-75.845
CNCLEP00123812	E.J. van Nieukerken	PreservedSpecimen	Ectoedemia ulmella						3 leafmines in 2 leaves		Canada	Québec			Kingsmere	[Freeman & Lewis]	1955-09-10					55-280								CNC	in plastic; round label "25"	leafmine collection	Ulmus rubra	Elm (slippery), Ulmus fulva Michx.									07/2015		decimal degrees	google earth	WGS84	45.489	-75.845
CNCLEP00123814	E.J. van Nieukerken	PreservedSpecimen	Ectoedemia ulmella						3 leafmines in 3 leaves		Canada	Québec			Kingsmere	[Freeman & Lewis]	1955-09-10		1955			C.N.C. No 55-279								CNC	in plastic	leafmine collection	Ulmus rubra	Ulmus rubra Muhl.									07/2015		decimal degrees	google earth	WGS84	45.489	-75.845
CNCLEP00104505	Wilkinson & Scoble	PreservedSpecimen	Ectoedemia ulmella		1					larva	Canada	Québec			Kingsmere	G.G.Lewis	1955-09-11			1956-06-30		55-281								CNC		drawer Nept_9	Ulmus rubra	Ulmus fulva			MIC6730	CNC3388	genitalia			GL			decimal degrees	google earth	WGS84	45.489	-75.845
CNCLEP00120556	Wilkinson & Scoble	PreservedSpecimen	Ectoedemia ulmella	1						larva	Canada	Québec			Kingsmere	G.G. Lewis	1955-09-11			1956-06-27		55-281								CNC		drawer Nept_9	Ulmus rubra	Ulmus fulva			MIC6729	CNC2971	genitalia			GL			decimal degrees	google earth	WGS84	45.489	-75.845
CNCLEP00123813	E.J. van Nieukerken	PreservedSpecimen	Ectoedemia ulmella						2 leafmines in 2 leaves		Canada	Québec			Kingsmere	[Freeman & Lewis]	1955-09-11					55-281								CNC	in plastic	leafmine collection	Ulmus rubra	Slippery Elm, Ulmus rubra Muhl.									07/2015		decimal degrees	google earth	WGS84	45.489	-75.845
CNCLEP00122221	E.J. van Nieukerken	PreservedSpecimen	Ectoedemia ulmella	1						adult	Canada	Québec			Gatineau, Aylmer	J.-F. Landry	1989-06-11										MVL		light collected	CNC		drawer Nept_9											06/2015		decimal degrees	google earth	WGS84	45.4	-75.85
CNCLEP00122222	E.J. van Nieukerken	PreservedSpecimen	Ectoedemia ulmella		1					adult	Canada	Québec			Gatineau, Aylmer	J.-F. Landry	1989-07-07										MVL		light collected	CNC		drawer Nept_9											06/2015		decimal degrees	google earth	WGS84	45.4	-75.85
CNCLEP00122260	E.J. van Nieukerken	PreservedSpecimen	Ectoedemia ulmella	1						adult	Canada	Québec			Gatineau, Aylmer, 48 rue Notre-Dame	J.-F. Landry	1997-08-01											On window		CNC		drawer Nept_9											06/2015		decimal degrees	identical as Rue du Couvent	WGS84	45.3967	-75.849
CNCLEP00122143	E.J. van Nieukerken	PreservedSpecimen	Ectoedemia ulmella		1					adult	Canada	Québec			Gatineau, Aylmer, 18 rue Washington	B. Landry	1999-06-21										MVL		light collected	CNC		drawer Nept_9											06/2015		decimal degrees	google earth	WGS84	45.3973	-75.8418
CNCLEP00122142	E.J. van Nieukerken	PreservedSpecimen	Ectoedemia ulmella	1						adult	Canada	Québec			Gatineau, Aylmer, 18 rue Washington	B. Landry	1999-06-22										MVL		light collected	CNC		drawer Nept_9											06/2015		decimal degrees	google earth	WGS84	45.3973	-75.8418
CNCLEP00123810	E.J. van Nieukerken	PreservedSpecimen	Ectoedemia ulmella						4 leafmines in 3 leaves		Canada	Québec			Quyon	[Freeman & Lewis]			1969			C.N.C. No 69-66								CNC	in plastic	leafmine collection	Ulmus americana	Ulmus americana									07/2015		decimal degrees	google earth	WGS84	45.517	-76.236
CNCLEP00123815	E.J. van Nieukerken	PreservedSpecimen	Ectoedemia ulmella						2 leafmines in 2 leaves		Canada	Québec			Kingsmere	[Freeman & Lewis]			1971			C.N.C. No 71-14								CNC	in plastic	leafmine collection	Ulmus americana	Ulmus americana									07/2015		decimal degrees	google earth	WGS84	45.489	-75.845
CNCLEP00123816	E.J. van Nieukerken	PreservedSpecimen	Ectoedemia ulmella						3 leafmines in 3 leaves		Canada	Québec			Kingsmere	[Freeman & Lewis]			1971			C.N.C. No 71-15								CNC	in plastic	leafmine collection	Ulmus americana	Ulmus americana									07/2015		decimal degrees	google earth	WGS84	45.489	-75.845
RMNH.INS.43262	E.J. van Nieukerken	PreservedSpecimen	Ectoedemia ulmella						several		United States	Alabama	Monroe Co.	Haines Island Park	along Alabama River	E.J. van Nieukerken & C. Doorenweerd	2010-10-12					EvN no 2010237-2H					leafmines	pine forest and hardwood along river		RMNH	vacated mines	small envelope	Ulmus	Ulmus		E.J. van Nieukerken							2017-03-29			GPS Dakota	WGS84	31.7251	-87.4691
RMNH.INS.43796	E.J. van Nieukerken	PreservedSpecimen	Ectoedemia ulmella						several		United States	Florida	Volusia Co.	Lake Woodruff NWR	Mud Lake Road	E.J. van Nieukerken	2016-09-24					EvN no 2016034-1H					leafmines	forest edge at swamp		RMNH	vacated mines	Small envelope	Ulmus americana	Ulmus americana		E.J. van Nieukerken										GPS Samsung	WGS84	29.1069	-81.3716
RMNH.INS.43797	E.J. van Nieukerken	PreservedSpecimen	Ectoedemia ulmella						1	larva	United States	Florida	Volusia Co.	Lake Woodruff NWR	Mud Lake Road	E.J. van Nieukerken	2016-09-24					EvN no 2016034-1K					leafmines	forest edge at swamp		RMNH	parasitoid reared, not kept	Small envelope	Ulmus americana	Ulmus americana		E.J. van Nieukerken										GPS Samsung	WGS84	29.1069	-81.3716
CNCLEP00042509	E.J. van Nieukerken	PreservedSpecimen	Ectoedemia ulmella		1					adult	United States	Maryland	Calvert Co.	Scientists Cliffs,	2179 Bluebell Road	JF Landry	2007-08-03										@ MVL		light collected	CNC		drawer Nept_9											06/2015		decimal degrees	label	WGS84	38.5195	-76.5136
	C. Eiseman	PreservedSpecimen	Ectoedemia ulmella						several		United States	Massachusetts	Hampshire Co.	Northampton	Northampton Bikeway west of King St.	C. Eiseman	2013-09-13							data received from Charley Eismean, May 2018						Eiseman, C., personal collection			Ulmus	Ulmus		C. Eiseman											WGS84	42.3292	-72.6375
RMNH.INS.43157	E.J. van Nieukerken	PreservedSpecimen	Ectoedemia ulmella						several		United States	Mississippi	Oktibbeha Co.	Black Prairie Reserve	nr 16th Section Rd	E.J. van Nieukerken & C. Doorenweerd	2010-10-06					EvN no 2010172-1H					leafmines	prarie strip on limestone andd forest edge		RMNH	vacated mines	small envelope	Ulmus alata	Ulmus alata		E.J. van Nieukerken							2017-03-15			GPS Dakota	WGS84	33.5126	-88.7365
RMNH.INS.18563	E.J. van Nieukerken	PreservedSpecimen	Ectoedemia ulmella				1			larva	United States	New York	Essex Co.	S Wilmington	W branch Ausable river	E.J. van Nieukerken	2011-09-13					EvN no 2011227-1M		larva taken from mine			leafmines	mixed forest along river on sand		RMNH	DNA extract		Ulmus americana	Ulmus americana		E.J. van Nieukerken							2017-08-11			GPS Dakota	WGS84	44.3662	-73.8412
RMNH.INS.43614	E.J. van Nieukerken	PreservedSpecimen	Ectoedemia ulmella						2		United States	New York	Essex Co.	S Wilmington	W branch Ausable river	E.J. van Nieukerken	2011-09-13					EvN no 2011227-1H					leafmines	mixed forest along river on sand		RMNH	vacated mines	Small envelope	Ulmus americana	Ulmus americana		E.J. van Nieukerken							2017-08-11			GPS Dakota	WGS84	44.3662	-73.8412
RMNH.INS.43615	E.J. van Nieukerken	PreservedSpecimen	Ectoedemia ulmella						1	larva	United States	New York	Essex Co.	S Wilmington	W branch Ausable river	E.J. van Nieukerken	2011-09-13					EvN no 2011227-1M	RMNH.INS.18563				leafmines	mixed forest along river on sand		RMNH	larva barcoded	Small envelope	Ulmus americana	Ulmus americana		E.J. van Nieukerken							2017-08-11			GPS Dakota	WGS84	44.3662	-73.8412
RMNH.INS.43635	E.J. van Nieukerken	PreservedSpecimen	Ectoedemia ulmella						several		United States	New York	Essex Co.	Wilsboro	Noblewood Park	E.J. van Nieukerken	2011-09-14					EvN no 2011241-H					leafmines	rich moist forest, margins		RMNH	vacated mines	Small envelope	Ulmus americana	Ulmus americana		E.J. van Nieukerken										GPS Dakota	WGS84	44.3522	-73.3644
RMNH.INS.43636	E.J. van Nieukerken	PreservedSpecimen	Ectoedemia ulmella						5	larva	United States	New York	Essex Co.	Wilsboro	Noblewood Park	E.J. van Nieukerken	2011-09-14					EvN no 2011241-K					leafmines	rich moist forest, margins		RMNH	rearing failed	Small envelope	Ulmus americana	Ulmus americana		E.J. van Nieukerken										GPS Dakota	WGS84	44.3522	-73.3644
CNCLEP00104506	E.J. van Nieukerken	PreservedSpecimen	Ectoedemia ulmella	1						larva	United States	New York	Tompkins Co.		Cornell Univ.	Murtfeldt Coll.				1994-08-14		Lot 451 sub. 618		slide missing						CNC		drawer Nept_9	Ulmus	from elm			T90								decimal degrees	google earth	WGS84	42.45	-76.47
RMNH.INS.42956	E.J. van Nieukerken	PreservedSpecimen	Ectoedemia ulmella						3		United States	North Carolina	Haywood Co.	NP Great Smoky Mts	Big Creek area	E.J. van Nieukerken & C. Doorenweerd	2010-09-28					EvN no 2010076-2H					leafmines	hardwood forest along river		RMNH	vacated mines	small envelope	Ulmus alata	Ulmus alata		E.J. van Nieukerken							2017-03-01			GPS Dakota	WGS84	35.7506	-83.1089
RMNH.INS.18286	E.J. van Nieukerken	PreservedSpecimen	Ectoedemia ulmella				1			larva	United States	Tennessee	Blount Co.	NP Great Smoky Mts	Rich Mountain Gap	E.J. van Nieukerken & C. Doorenweerd	2010-10-02					EvN no 2010121-1M		cocoon with larva			leafmines	rich forest on limestone ridge	reared from larva	RMNH	DNA extract (+slide)		Ulmus americana	Ulmus americana		E.J. van Nieukerken	RMNH.INS.18286.P		larval skin	euparal	JC Koster	2016-12-31				GPS Dakota	WGS84	35.6456	-83.8054
RMNH.INS.18287	E.J. van Nieukerken	PreservedSpecimen	Ectoedemia ulmella				1			larva	United States	Tennessee	Blount Co.	NP Great Smoky Mts	Rich Mountain Gap	E.J. van Nieukerken & C. Doorenweerd	2010-10-02					EvN no 2010121-1M		larva taken from mine			leafmines	rich forest on limestone ridge	reared from larva	RMNH	Tissue collection -80	Freezer Box31	Ulmus americana	Ulmus americana		E.J. van Nieukerken										GPS Dakota	WGS84	35.6456	-83.8054
RMNH.INS.18288	E.J. van Nieukerken	PreservedSpecimen	Ectoedemia ulmella				1			larva	United States	Tennessee	Blount Co.	NP Great Smoky Mts	Rich Mountain Gap	E.J. van Nieukerken & C. Doorenweerd	2010-10-02					EvN no 2010121-1M		larva taken from mine			leafmines	rich forest on limestone ridge	reared from larva	RMNH	DNA extract (+slide)		Ulmus americana	Ulmus americana		E.J. van Nieukerken	RMNH.INS.18288.P		larval skin	euparal	JC Koster	2016-12-31				GPS Dakota	WGS84	35.6456	-83.8054
RMNH.INS.43068	E.J. van Nieukerken	PreservedSpecimen	Ectoedemia ulmella						several		United States	Tennessee	Blount Co.	NP Great Smoky Mts	Rich Mountain Gap	E.J. van Nieukerken & C. Doorenweerd	2010-10-02					EvN no 2010121-1H					leafmines	rich forest on limestone ridge		RMNH	vacated mines	(1 of 2) small envelope	Ulmus americana	Ulmus americana		E.J. van Nieukerken							2017-03-13			GPS Dakota	WGS84	35.6456	-83.8054
RMNH.INS.43069	E.J. van Nieukerken	PreservedSpecimen	Ectoedemia ulmella						several		United States	Tennessee	Blount Co.	NP Great Smoky Mts	Rich Mountain Gap	E.J. van Nieukerken & C. Doorenweerd	2010-10-02					EvN no 2010121-1H					leafmines	rich forest on limestone ridge		RMNH	vacated mines	(2 of 2) small envelope	Ulmus americana	Ulmus americana		E.J. van Nieukerken							2017-03-13			GPS Dakota	WGS84	35.6456	-83.8054
RMNH.INS.43070	E.J. van Nieukerken	PreservedSpecimen	Ectoedemia ulmella						3	larva	United States	Tennessee	Blount Co.	NP Great Smoky Mts	Rich Mountain Gap	E.J. van Nieukerken & C. Doorenweerd	2010-10-02					EvN no 2010121-1M	RMNH.INS.18286, RMNH.INS.18287, RMNH.INS.18288				leafmines	rich forest on limestone ridge		RMNH	larva barcoded	small envelope	Ulmus americana	Ulmus americana		E.J. van Nieukerken							2017-03-13			GPS Dakota	WGS84	35.6456	-83.8054
RMNH.INS.24338	E.J. van Nieukerken	PreservedSpecimen	Ectoedemia ulmella	1						larva	United States	Tennessee	Blount Co.	Townsend	Laurel Valley	E.J. van Nieukerken & C. Doorenweerd	2010-10-03			2011-04-11	2011-04-19	EvN no 2010143-1K		+ DNA extract			leafmines	secondary forest, park landscape	reared from larva	RMNH			Ulmus americana	Ulmus americana		E.J. van Nieukerken	EvN4338		Male genitalia				1208			GPS Dakota	WGS84	35.6747	-83.8085
RMNH.INS.24339	E.J. van Nieukerken	PreservedSpecimen	Ectoedemia ulmella		2					larva	United States	Tennessee	Blount Co.	Townsend	Laurel Valley	E.J. van Nieukerken & C. Doorenweerd	2010-10-03			2011-04-11	2011-04-19	EvN no 2010143-1K		+ DNA extract			leafmines	secondary forest, park landscape	reared from larva	RMNH			Ulmus americana	Ulmus americana		E.J. van Nieukerken	EvN4339		Female genitalia				1208			GPS Dakota	WGS84	35.6747	-83.8085
RMNH.INS.43105	E.J. van Nieukerken	PreservedSpecimen	Ectoedemia ulmella						several		United States	Tennessee	Blount Co.	Townsend	Laurel Valley	E.J. van Nieukerken & C. Doorenweerd	2010-10-03					EvN no 2010143-1H					leafmines	secondary forest, park landscape		RMNH	vacated mines	small envelope	Ulmus americana	Ulmus americana		E.J. van Nieukerken							2017-03-13			GPS Dakota	WGS84	35.6747	-83.8085
RMNH.INS.43106	E.J. van Nieukerken	PreservedSpecimen	Ectoedemia ulmella						5	larva	United States	Tennessee	Blount Co.	Townsend	Laurel Valley	E.J. van Nieukerken & C. Doorenweerd	2010-10-03					EvN no 2010143-1K					leafmines	secondary forest, park landscape		RMNH	larvae reared	small envelope	Ulmus americana	Ulmus americana		E.J. van Nieukerken							2017-03-13			GPS Dakota	WGS84	35.6747	-83.8085
RMNH.INS.43692	E.J. van Nieukerken	PreservedSpecimen	Ectoedemia ulmella						1		United States	Vermont	Addison Co.	Addison	Dead Creek WMA	E.J. van Nieukerken	2011-09-16					EvN no 2011262-2H					leafmines	low bushes in pond marsh area		RMNH	vacated mine	Small envelope	Ulmus americana	Ulmus americana		E.J. van Nieukerken										GPS Dakota	WGS84	44.0853	-73.3451
RMNH.INS.40328	E.J. van Nieukerken	PreservedSpecimen	Ectoedemia ulmella						2		United States	Vermont	Chittenden Co.	Burlington	Colchester Bog	E.J. van Nieukerken, C. Eiseman & J. Blyth	2015-09-05					EvN no 2015200-1H					leafmines	wet mixed forest near peat bog		RMNH	vacated mines	small envelope	Ulmus americana	Ulmus americana		E.J. van Nieukerken										GPS Dakota	WGS84	44.5472	-73.283
[truncated: 11 more columns]
